# Supplementary material for: First and second sphere interactions accelerate non-native N -alkylation catalysis by the thermostable, methanol-tolerant B 12 -dependent enzyme MtaC
Source: Royal Society of Chemistry journal article supplement (doi:10.1039/d3cc01071f), 2023-01-01
Supplement: d3cc01071f1.xlsx [file d3cc01071f1.xlsx]

## Sheet: UV-Vis
Baseline 100%T		AK_b12_kpi_061522		AK_MtaC_kpi_061522		B12MeOHAK3		MtaCMeOHAK4
Wavelength (nm)	Abs	Wavelength (nm)	Abs	Wavelength (nm)	Abs	Wavelength (nm)	Abs	Wavelength (nm)	Abs
800	0.0163964	800	-0.000482091	800	0.00227217	699.994	-0.00223653	699.994	0.010393
798.99	0.0150808	798.99	0.00260884	798.99	0.00304206	698.983	-0.00215328	698.983	0.0104996
798.015	0.0166253	798.015	-0.000730767	798.015	0.00296902	698.009	-0.00249846	698.009	0.010862
797.005	0.0169596	797.005	3.88e-07	797.005	0.000496803	696.998	-0.00170682	696.998	0.0109836
795.994	0.016346	795.994	-0.000863422	795.994	0.00144362	695.987	-0.00188934	695.987	0.0114576
794.983	0.0170317	794.983	-0.00100885	794.983	0.00129013	695.011	-0.00252172	695.011	0.0111217
794.006	0.0166577	794.006	8.58e-05	794.006	0.00244533	694	-0.0019029	694	0.0114266
792.995	0.0169601	792.995	0.00102388	792.995	0.00166309	692.987	-0.00209826	692.987	0.0118869
792.017	0.0160072	792.017	0.000791667	792.017	0.00174064	692.011	-0.00223802	692.011	0.0122525
791.004	0.0161506	791.004	0.000775122	791.004	0.00319544	690.998	-0.00194258	690.998	0.0117888
789.991	0.0172215	789.991	4.27e-06	789.991	0.00105995	689.985	-0.000936786	689.985	0.0130313
789.013	0.0169005	789.013	0.000206231	789.013	0.00176388	689.008	-0.00217549	689.008	0.0109609
787.999	0.016909	787.999	-0.000510482	787.999	0.0021783	687.994	-0.00171879	687.994	0.0128907
786.985	0.0165374	786.985	2.17e-05	786.985	0.00174303	687.016	-0.00197026	687.016	0.0116347
786.005	0.0160965	786.005	0.00105673	786.005	0.00208899	686.002	-0.0025805	686.002	0.0125149
784.99	0.0173158	784.99	-0.000831437	784.99	0.00136309	684.987	-0.0026474	684.987	0.0121503
784.01	0.0160924	784.01	0.00143183	784.01	0.00281488	684.008	-0.00191212	684.008	0.0133368
782.994	0.0161803	782.994	0.000632	782.994	0.00216792	682.993	-0.00112531	682.993	0.0141697
782.013	0.0161382	782.013	-8.11e-05	782.013	0.00178324	682.013	-0.00242613	682.013	0.0129271
780.996	0.0160844	780.996	0.000861199	780.996	0.00246202	680.997	-0.00225883	680.997	0.0128999
780.014	0.0170842	780.014	-0.00150545	780.014	0.000670342	680.017	-0.00121907	680.017	0.013742
778.997	0.0161794	778.997	0.00066692	778.997	0.00209721	679.001	-0.000992317	679.001	0.0140922
778.014	0.0162939	778.014	0.00100455	778.014	0.00211838	677.984	-0.00155931	677.984	0.0141124
776.996	0.0158969	776.996	0.00129036	776.996	0.00178378	677.003	-0.00236522	677.003	0.0127305
776.012	0.0171536	776.012	-0.00109086	776.012	0.00205125	675.985	-0.00102315	675.985	0.0148622
774.993	0.0161755	774.993	0.00106608	774.993	0.00200998	675.003	-0.00143745	675.003	0.0145262
774.009	0.0173373	774.009	-0.00117214	774.009	-8.26e-05	673.985	-0.00153574	673.985	0.0137655
772.989	0.0172807	772.989	-0.00108327	772.989	0.00111507	673.003	-0.000854276	673.003	0.0144286
772.005	0.0162808	772.005	0.000334368	772.005	0.00234613	671.984	-0.00162864	671.984	0.0151198
770.984	0.0158365	770.984	0.000347218	770.984	0.00255955	671.001	-0.00113687	671.001	0.0149505
769.998	0.0152624	769.998	0.000368073	769.998	0.00275882	669.982	-0.00189661	669.982	0.0154413
769.012	0.016292	769.012	0.000248188	769.012	0.000632648	668.999	-0.000518755	668.999	0.0151649
767.991	0.0157184	767.991	0.000664094	767.991	0.00235912	668.015	-0.000100944	668.015	0.0161818
767.004	0.0158153	767.004	0.000283907	767.004	0.00193129	666.995	-0.00108012	666.995	0.0155416
766.017	0.0163043	766.017	-7.27e-05	766.017	0.000750072	666.01	-0.00162312	666.01	0.015316
764.994	0.0159796	764.994	-0.000125684	764.994	0.00124407	664.989	-0.00110016	664.989	0.016162
764.006	0.0163961	764.006	-5.34e-05	764.006	0.00161011	664.004	-0.000838052	664.004	0.0162038
762.983	0.0162127	762.983	0.000376234	762.983	0.00137475	662.983	-0.00134678	662.983	0.0159559
761.994	0.0154939	761.994	0.00065528	761.994	0.00207136	661.997	-0.000537216	661.997	0.0164797
761.005	0.0152994	761.005	0.00100318	761.005	0.00194276	661.012	-0.000480747	661.012	0.0169479
760.016	0.0154269	760.016	0.00029805	760.016	0.0027136	659.989	-0.000458664	659.989	0.0170143
758.991	0.015772	758.991	0.000638144	758.991	0.000339912	659.003	-0.000692725	659.003	0.016504
758.001	0.014949	758.001	0.000285772	758.001	0.00160957	658.016	-0.000241966	658.016	0.0177506
757.01	0.0148761	757.01	0.000355534	757.01	0.00124104	656.993	-0.000628419	656.993	0.0168076
755.984	0.0137979	755.984	0.000374939	755.984	0.00256726	656.005	-0.000610221	656.005	0.0172258
754.993	0.0141264	754.993	8.54e-07	754.993	0.0020409	655.018	-0.000969279	655.018	0.0178407
754.002	0.0138764	754.002	0.000279244	754.002	0.00279081	653.993	-0.000158497	653.993	0.0179257
753.01	0.0134232	753.01	0.000338876	753.01	0.00244046	653.005	-0.000916586	653.005	0.0178593
752.017	0.0132458	752.017	0.000699847	752.017	0.00101387	652.017	-0.000430995	652.017	0.018512
750.99	0.0123134	750.99	0.000994719	750.99	0.00337079	650.992	0.000168032	650.992	0.0181369
749.997	0.0129637	749.997	-0.000200984	749.997	0.00236092	650.003	-0.000184528	650.003	0.0186616
749.003	0.0121509	749.003	0.000424012	749.003	0.00327076	649.013	-0.000286567	649.013	0.0190091
748.01	0.0113032	748.01	0.00163654	748.01	0.00317857	647.987	0.000692354	647.987	0.0191994
747.016	0.011196	747.016	0.00218532	747.016	0.00302532	646.998	-0.000204451	646.998	0.0189184
745.986	0.0108995	745.986	0.00126944	745.986	0.00224446	646.007	-0.000261111	646.007	0.0194678
744.991	0.0105578	744.991	0.000588217	744.991	0.0026408	645.017	7.24609e-05	645.017	0.0199835
743.996	0.010645	743.996	-2.4e-05	743.996	0.0021727	643.99	-0.00028191	643.99	0.0200662
743.001	0.0100043	743.001	0.00126139	743.001	0.0022116	642.999	0.000503619	642.999	0.0198445
742.005	0.00920161	742.005	0.00117666	742.005	0.0026153	642.008	-0.000319471	642.008	0.0199743
741.009	0.00892043	741.009	0.00096107	741.009	0.003253	641.016	4.18855e-05	641.016	0.0210978
740.012	0.00861192	740.012	0.000879771	740.012	0.00305561	639.987	9.9543e-05	639.987	0.020627
739.015	0.00745276	739.015	0.000968827	739.015	0.0036335	638.995	0.000646958	638.995	0.0207553
737.983	0.00739954	737.983	0.000779193	737.983	0.00267497	638.003	0.00093671	638.003	0.0213156
736.985	0.00679759	736.985	0.000838064	736.985	0.00347103	637.01	0.00178813	637.01	0.0230185
735.987	0.0069265	735.987	0.000385406	735.987	0.00254254	636.017	0.0016633	636.017	0.0226088
734.989	0.00509383	734.989	0.000847012	734.989	0.00266361	634.987	0.000841358	634.987	0.0219786
733.991	0.00476347	733.991	0.000827767	733.991	0.00211253	633.994	0.00174051	633.994	0.0233927
732.992	0.00416197	732.992	0.000306987	732.992	0.00237466	633	0.00118377	633	0.0225341
731.992	0.00326599	731.992	0.000168939	731.992	0.00243742	632.006	0.000997132	632.006	0.0233767
730.993	0.00238923	730.993	0.000307194	730.993	0.00214026	631.012	0.00194549	631.012	0.0236629
729.993	0.000733373	729.993	0.00107438	729.993	0.00304419	630.017	0.00178641	630.017	0.0239799
728.993	-4.14e-05	728.993	-3.34e-05	728.993	0.00303786	628.985	0.00184045	628.985	0.0239685
727.992	-0.000845079	727.992	0.000213249	727.992	0.00285253	627.99	0.00152986	627.99	0.0245899
726.991	-0.00224111	726.991	0.00127286	726.991	0.00323336	626.995	0.00267505	626.995	0.0252968
725.99	-0.002349	725.99	0.000574375	725.99	0.00246634	625.999	0.00253723	625.999	0.0256154
724.988	-0.0034668	724.988	0.000674465	724.988	0.00326226	625.003	0.00270307	625.003	0.0257423
723.986	-0.00408223	723.986	0.00127751	723.986	0.00361758	624.007	0.00301831	624.007	0.0264578
722.984	-0.00465043	722.984	0.00102378	722.984	0.00357109	623.01	0.0033224	623.01	0.0266843
722.017	-0.00531538	722.017	0.000907137	722.017	0.00372304	622.013	0.00285034	622.013	0.0269354
721.014	-0.00492064	721.014	0.000215865	721.014	0.00267624	621.016	0.00278776	621.016	0.0268737
720.01	-0.00508001	720.01	0.000666039	720.01	0.00238944	619.982	0.00326891	619.982	0.0282006
719.007	-0.00539234	719.007	0.000286808	719.007	0.00307644	618.984	0.00278445	618.984	0.0279871
718.003	-0.00576418	718.003	0.00031095	718.003	0.00315075	617.986	0.00348116	617.986	0.028865
716.998	-0.00626553	716.998	0.00104871	716.998	0.00381767	616.988	0.0034343	616.988	0.0289097
715.994	-0.00565299	715.994	0.000636484	715.994	0.00318259	615.99	0.00488804	615.99	0.029885
714.988	-0.0056673	714.988	0.00137356	714.988	0.00343933	614.991	0.00462332	614.991	0.0296924
713.983	-0.0053925	713.983	0.000705655	713.983	0.00327877	613.992	0.00443517	613.992	0.0304445
713.013	-0.00559974	713.013	0.00078508	713.013	0.00350911	612.992	0.00475604	612.992	0.0310837
712.007	-0.00557996	712.007	0.00134227	712.007	0.00313294	611.993	0.00492537	611.993	0.0310589
711.001	-0.00541469	711.001	0.00120241	711.001	0.00355493	610.993	0.0059384	610.993	0.0320381
709.994	-0.00517988	709.994	0.00114808	709.994	0.0035643	609.993	0.00572377	609.993	0.0326624
708.987	-0.00473688	708.987	0.00119068	708.987	0.00396161	608.993	0.00586735	608.993	0.033299
708.016	-0.00397031	708.016	0.00128164	708.016	0.00335285	607.992	0.00592321	607.992	0.0339805
707.008	-0.00346013	707.008	0.000689295	707.008	0.00337865	606.991	0.00656786	606.991	0.0339275
706	-0.00249058	706	0.000744108	706	0.00368894	605.99	0.00620907	605.99	0.0344381
704.992	-0.00263618	704.992	0.00100863	704.992	0.00420013	604.989	0.00712642	604.989	0.0351429
703.983	-0.00156999	703.983	0.000708014	703.983	0.0038241	603.987	0.00699629	603.987	0.0360626
703.01	-0.00160914	703.01	0.00104747	703.01	0.00409666	602.985	0.0075433	602.985	0.0373278
702	-0.00092697	702	0.000435413	702	0.00376048	601.983	0.00724672	601.983	0.0370161
700.991	-0.000722962	700.991	0.000876036	700.991	0.00426924	601.017	0.0079424	601.017	0.038493
700.017	1.74e-05	700.017	0.00121972	700.017	0.0040513	600.015	0.0088319	600.015	0.0398113
699.006	0.000970773	699.006	0.00116872	699.006	0.0042294	599.012	0.0101195	599.012	0.0408699
697.996	0.00277289	697.996	0.000371648	697.996	0.00359043	598.008	0.00940438	598.008	0.0418831
696.985	0.00300452	696.985	0.00087697	696.985	0.00446985	597.005	0.0100543	597.005	0.0429249
696.01	0.00350845	696.01	0.00047436	696.01	0.00398512	596.001	0.0105215	596.001	0.0441304
694.998	0.0039678	694.998	0.00122219	694.998	0.00413364	594.997	0.0110989	594.997	0.0456231
693.986	0.00485678	693.986	0.00098019	693.986	0.00428927	593.993	0.0118192	593.993	0.0465542
693.01	0.00489958	693.01	0.00158982	693.01	0.00499557	592.988	0.013061	592.988	0.0487283
691.997	0.00538945	691.997	0.00121297	691.997	0.00496904	591.983	0.0135867	591.983	0.049509
690.984	0.00644142	690.984	0.000632829	690.984	0.00457416	591.015	0.0137945	591.015	0.0511531
690.007	0.00679898	690.007	0.00112945	690.007	0.00420525	590.01	0.0146869	590.01	0.0525732
688.993	0.0076546	688.993	0.00086273	688.993	0.00452901	589.004	0.0157026	589.004	0.0537972
688.016	0.0076644	688.016	0.00110482	688.016	0.00488448	587.999	0.0170204	587.999	0.0561357
687.001	0.00787244	687.001	0.00140916	687.001	0.00553637	586.992	0.0176911	586.992	0.0580667
685.987	0.00879045	685.987	0.0015675	685.987	0.00452849	585.986	0.0187275	585.986	0.0599516
685.008	0.00847572	685.008	0.00137792	685.008	0.0052924	585.017	0.0193401	585.017	0.061867
683.993	0.00921542	683.993	0.00168279	683.993	0.00513364	584.01	0.0209183	584.01	0.0638508
683.014	0.010426	683.014	0.00107306	683.014	0.00412212	583.003	0.0219204	583.003	0.0652212
681.998	0.0104403	681.998	0.00138083	681.998	0.00464485	581.995	0.0238319	581.995	0.068244
681.018	0.0106715	681.018	0.000726631	681.018	0.00569229	580.988	0.0251581	580.988	0.0704427
680.002	0.0114687	680.002	0.00113537	680.002	0.00487348	580.017	0.0268406	580.017	0.073183
678.985	0.0119681	678.985	0.000832462	678.985	0.00478635	579.009	0.0284734	579.009	0.0760002
678.004	0.0122294	678.004	0.00114357	678.004	0.00498326	578.001	0.0300125	578.001	0.0780934
676.987	0.0125197	676.987	0.00144235	676.987	0.00558218	576.992	0.0322111	576.992	0.0815975
676.005	0.0126151	676.005	0.00112664	676.005	0.00530047	575.983	0.0345301	575.983	0.0847723
674.987	0.0128412	674.987	0.00119758	674.987	0.00620524	575.011	0.0374345	575.011	0.0875031
674.005	0.0135304	674.005	0.00152983	674.005	0.00555979	574.002	0.0400129	574.002	0.0911133
672.987	0.0138718	672.987	0.00104685	672.987	0.00582668	572.992	0.042788	572.992	0.0935981
672.004	0.0142039	672.004	0.00107415	672.004	0.00552056	571.982	0.0463186	571.982	0.0969319
670.985	0.0143604	670.985	0.00174498	670.985	0.0059368	571.01	0.049723	571.01	0.100701
670.002	0.0141998	670.002	0.00181495	670.002	0.00586661	569.999	0.0531362	569.999	0.103911
669.018	0.0138134	669.018	0.00219659	669.018	0.00706108	568.988	0.056103	568.988	0.107699
667.998	0.014246	667.998	0.00180936	667.998	0.00598774	568.015	0.0609427	568.015	0.111859
667.014	0.0140699	667.014	0.00155163	667.014	0.00663204	567.004	0.0652805	567.004	0.115244
665.993	0.0140363	665.993	0.00170303	665.993	0.00643766	565.992	0.0694923	565.992	0.118776
665.008	0.0139043	665.008	0.00137021	665.008	0.0069976	565.018	0.0747766	565.018	0.122976
663.987	0.0144704	663.987	0.00161804	663.987	0.00662208	564.006	0.0808156	564.006	0.127259
663.002	0.0135555	663.002	0.00183359	663.002	0.00666093	562.994	0.0861391	562.994	0.131124
662.016	0.0138789	662.016	0.00182912	662.016	0.00613792	561.982	0.0920913	561.982	0.135721
660.994	0.013826	660.994	0.001953	660.994	0.00694615	561.007	0.097343	561.007	0.139511
660.007	0.0137535	660.007	0.00152664	660.007	0.00700815	559.994	0.104786	559.994	0.144405
658.985	0.0144996	658.985	0.00159769	658.985	0.00667912	559.018	0.110126	559.018	0.148461
657.998	0.0145296	657.998	0.00120033	657.998	0.00715418	558.005	0.117899	558.005	0.152621
657.011	0.0142248	657.011	0.00218956	657.011	0.00712866	556.991	0.125169	556.991	0.15715
655.987	0.0144738	655.987	0.0012387	655.987	0.00712037	556.015	0.132143	556.015	0.162235
654.999	0.0146548	654.999	0.00135561	654.999	0.00788314	555.001	0.13919	555.001	0.16692
654.011	0.0144664	654.011	0.00140703	654.011	0.00789292	553.987	0.146549	553.987	0.170569
652.987	0.0137386	652.987	0.0029703	652.987	0.00785712	553.01	0.153212	553.01	0.175033
651.998	0.0142027	651.998	0.00235764	651.998	0.00732756	551.995	0.160781	551.995	0.17919
651.009	0.014142	651.009	0.00231743	651.009	0.00831445	551.018	0.169915	551.018	0.184226
649.984	0.0142379	649.984	0.00210697	649.984	0.00787375	550.002	0.180499	550.002	0.188411
648.994	0.014579	648.994	0.00244124	648.994	0.00819757	548.987	0.189193	548.987	0.193377
648.005	0.0146122	648.005	0.00191184	648.005	0.00782004	548.009	0.195323	548.009	0.197502
647.015	0.015133	647.015	0.0014977	647.015	0.00809307	546.993	0.202107	546.993	0.200263
645.988	0.0147299	645.988	0.00246045	645.988	0.00770192	546.014	0.21043	546.014	0.20388
644.997	0.0149175	644.997	0.000936269	644.997	0.0085904	544.998	0.219481	544.998	0.207456
644.006	0.0148061	644.006	0.00193875	644.006	0.00922174	544.019	0.226275	544.019	0.210748
643.015	0.0152148	643.015	0.00177063	643.015	0.00813247	543.002	0.231506	543.002	0.212949
641.987	0.0160361	641.987	0.0011111	641.987	0.00770324	541.985	0.236759	541.985	0.214647
640.996	0.0156368	640.996	0.00107355	640.996	0.00830492	541.005	0.241506	541.005	0.216238
640.004	0.0153015	640.004	0.00190875	640.004	0.00877434	539.987	0.246388	539.987	0.21758
639.011	0.0152202	639.011	0.00210252	639.011	0.00851825	539.007	0.250861	539.007	0.218031
637.982	0.0155287	637.982	0.00164651	637.982	0.00935468	537.989	0.254293	537.989	0.218982
636.989	0.0151344	636.989	0.00242185	636.989	0.00979558	537.008	0.25626	537.008	0.219251
635.996	0.0150421	635.996	0.00171733	635.996	0.010012	535.99	0.25793	535.99	0.218905
635.003	0.0150128	635.003	0.00227595	635.003	0.0101055	535.009	0.259692	535.009	0.218864
634.009	0.0152894	634.009	0.00206678	634.009	0.00967489	533.99	0.260677	533.99	0.218287
633.015	0.0155094	633.015	0.00194861	633.015	0.00988931	533.008	0.260989	533.008	0.217977
631.984	0.0158734	631.984	0.00176094	631.984	0.0101562	531.989	0.261117	531.989	0.217057
630.99	0.0154844	630.99	0.00182059	630.99	0.0111584	531.007	0.260778	531.007	0.215963
629.995	0.0155618	629.995	0.00209755	629.995	0.0103712	529.987	0.260007	529.987	0.215048
629	0.0159488	629	0.00231857	629	0.0104433	529.005	0.259224	529.005	0.214244
628.005	0.015394	628.005	0.00295526	628.005	0.0109672	527.984	0.258305	527.984	0.213737
627.009	0.0166877	627.009	0.00142591	627.009	0.0104886	527.001	0.256895	527.001	0.212207
626.013	0.0164405	626.013	0.00248349	626.013	0.01053	526.018	0.255325	526.018	0.211126
625.017	0.0161317	625.017	0.00201713	625.017	0.0112081	524.997	0.254033	524.997	0.210442
623.984	0.0165979	623.984	0.00196021	623.984	0.0108685	524.014	0.252899	524.014	0.209763
622.987	0.0161374	622.987	0.00223421	622.987	0.0109515	522.992	0.251451	522.992	0.209078
621.99	0.0159475	621.99	0.00223504	621.99	0.0115118	522.008	0.249434	522.008	0.208104
620.993	0.0167375	620.993	0.0016672	620.993	0.0108407	520.986	0.248675	520.986	0.207106
619.996	0.0167181	619.996	0.0019303	619.996	0.011197	520.002	0.247103	520.002	0.207588
618.998	0.0161809	618.998	0.00244338	618.998	0.0122959	519.018	0.246597	519.018	0.206835
618	0.0165899	618	0.00294272	618	0.0120524	517.995	0.245693	517.995	0.206459
617.002	0.0162157	617.002	0.00258064	617.002	0.0132687	517.01	0.2449	517.01	0.206222
616.003	0.0166154	616.003	0.00259014	616.003	0.0130971	515.987	0.24462	515.987	0.206031
615.004	0.0171062	615.004	0.00205458	615.004	0.0124811	515.001	0.244185	515.001	0.205903
614.005	0.0166218	614.005	0.00269078	614.005	0.0131247	514.016	0.243794	514.016	0.205333
613.006	0.0168815	613.006	0.00210795	613.006	0.0130643	512.992	0.243157	512.992	0.205193
612.006	0.0168066	612.006	0.00203534	612.006	0.0130906	512.006	0.242338	512.006	0.20513
611.006	0.0162221	611.006	0.00290895	611.006	0.0138902	510.982	0.242174	510.982	0.204627
610.006	0.0167249	610.006	0.00265535	610.006	0.0134498	509.995	0.24147	509.995	0.203744
609.005	0.0169623	609.005	0.00298276	609.005	0.0143565	509.009	0.241287	509.009	0.203848
608.005	0.0174116	608.005	0.00256009	608.005	0.0145105	507.984	0.240109	507.984	0.202805
607.004	0.016632	607.004	0.00302373	607.004	0.0152413	506.997	0.239103	506.997	0.201585
606.002	0.0163315	606.002	0.00331674	606.002	0.0156908	506.009	0.238183	506.009	0.200436
605.001	0.0166144	605.001	0.00338637	605.001	0.0156779	504.984	0.235841	504.984	0.198581
603.999	0.0170252	603.999	0.00341251	603.999	0.0162537	503.996	0.233868	503.996	0.197151
602.997	0.0174699	602.997	0.00340727	602.997	0.0165075	503.008	0.232364	503.008	0.195808
601.995	0.0174668	601.995	0.00309099	601.995	0.0171316	501.982	0.22985	501.982	0.193552
600.992	0.0171288	600.992	0.00327485	600.992	0.0173735	500.994	0.227267	500.994	0.191589
599.989	0.0163666	599.989	0.00453558	599.989	0.0189388	500.005	0.223935	500.005	0.189344
598.986	0.0164199	598.986	0.00408331	598.986	0.0190392	499.017	0.221033	499.017	0.186578
597.983	0.015968	597.983	0.00418696	597.983	0.0195411	497.99	0.216663	497.99	0.184435
597.016	0.0162332	597.016	0.00432977	597.016	0.0206207	497	0.213199	497	0.181824
596.012	0.0164426	596.012	0.00472388	596.012	0.0212132	496.011	0.209329	496.011	0.179392
595.008	0.0164285	595.008	0.00495881	595.008	0.0215507	494.983	0.204854	494.983	0.176997
594.004	0.0161142	594.004	0.00508165	594.004	0.022918	493.994	0.20025	493.994	0.174018
592.999	0.0162358	592.999	0.00543828	592.999	0.0234509	493.004	0.194779	493.004	0.171334
591.994	0.0160931	591.994	0.00519048	591.994	0.0240622	492.013	0.19117	492.013	0.16889
590.989	0.0158757	590.989	0.00576595	590.989	0.0255251	490.985	0.186669	490.985	0.166452
589.983	0.0161166	589.983	0.0054809	589.983	0.0257737	489.994	0.183161	489.994	0.164647
589.015	0.0155216	589.015	0.00618928	589.015	0.0274271	489.004	0.178687	489.004	0.162499
588.009	0.0157649	588.009	0.0065998	588.009	0.0282053	488.013	0.174403	488.013	0.160725
587.003	0.0161085	587.003	0.00597346	587.003	0.0291978	486.983	0.170585	486.983	0.158609
585.996	0.0158192	585.996	0.0072164	585.996	0.0298471	485.992	0.166878	485.992	0.1574
584.989	0.0151969	584.989	0.00801749	584.989	0.0314348	485	0.163089	485	0.155657
583.982	0.0156051	583.982	0.00809183	583.982	0.0325257	484.009	0.161193	484.009	0.15513
583.013	0.0150777	583.013	0.00864902	583.013	0.0345138	483.017	0.157801	483.017	0.153378
582.005	0.0149344	582.005	0.00900957	582.005	0.0355932	481.986	0.154859	481.986	0.151779
580.997	0.0149864	580.997	0.00937787	580.997	0.0370316	480.994	0.152193	480.994	0.150509
579.989	0.0147432	579.989	0.0100509	579.989	0.0390117	480.001	0.149691	480.001	0.148883
579.018	0.0147796	579.018	0.0102981	579.018	0.0398789	479.009	0.147791	479.009	0.148719
578.01	0.0146475	578.01	0.0110917	578.01	0.0418816	478.016	0.145334	478.016	0.14677
577.001	0.0140718	577.001	0.0126476	577.001	0.0434807	476.984	0.143484	476.984	0.145902
575.992	0.0138598	575.992	0.0131255	575.992	0.0449006	475.991	0.141447	475.991	0.14491
574.983	0.0142533	574.983	0.0136936	574.983	0.0470871	474.997	0.140021	474.997	0.143722
574.011	0.0138534	574.011	0.0143828	574.011	0.0489188	474.003	0.138189	474.003	0.143037
573.001	0.0135056	573.001	0.0157462	573.001	0.0510334	473.01	0.136468	473.01	0.141312
571.991	0.0138939	571.991	0.0161612	571.991	0.0518111	472.015	0.134852	472.015	0.140125
571.018	0.0138299	571.018	0.0172862	571.018	0.0541605	470.983	0.132876	470.983	0.13853
570.007	0.0129924	570.007	0.0190105	570.007	0.0566491	469.988	0.130825	469.988	0.136878
568.997	0.012571	568.997	0.0206696	568.997	0.0595851	468.994	0.129725	468.994	0.136127
567.986	0.0124039	567.986	0.021482	567.986	0.0611652	467.999	0.127915	467.999	0.134355
567.012	0.0120887	567.012	0.0229551	567.012	0.062927	467.004	0.125583	467.004	0.132885
566	0.012436	566	0.0240277	566	0.0647393	466.008	0.12342	466.008	0.131235
564.988	0.0120407	564.988	0.0256627	564.988	0.0671579	465.013	0.121405	465.013	0.129794
564.014	0.0117685	564.014	0.0269876	564.014	0.0699893	464.017	0.11943	464.017	0.12839
563.002	0.0113384	563.002	0.0286855	563.002	0.0722098	462.983	0.117147	462.983	0.126586
561.989	0.0110471	561.989	0.0303714	561.989	0.0745635	461.987	0.115472	461.987	0.125242
561.014	0.0110012	561.014	0.0316754	561.014	0.0765313	460.991	0.113441	460.991	0.124146
560.001	0.0107722	560.001	0.0339004	560.001	0.0785735	459.994	0.111488	459.994	0.123243
558.988	0.0100264	558.988	0.0357892	558.988	0.0818595	458.998	0.110079	458.998	0.121989
558.012	0.0104234	558.012	0.0374449	558.012	0.0828286	458.001	0.107786	458.001	0.121007
556.998	0.0097327	556.998	0.0389973	556.998	0.0856654	457.004	0.106533	457.004	0.120173
555.984	0.00924003	555.984	0.0413781	555.984	0.0878218	456.007	0.104722	456.007	0.119425
555.008	0.00856608	555.008	0.0437675	555.008	0.0907037	455.009	0.102935	455.009	0.118562
553.993	0.00810889	553.993	0.0454672	553.993	0.0924482	454.012	0.101854	454.012	0.118213
553.016	0.00770266	553.016	0.0476763	553.016	0.0948747	453.014	0.100755	453.014	0.117626
552.001	0.00809821	552.001	0.0489646	552.001	0.0973277	452.016	0.0993836	452.016	0.11699
550.986	0.0080326	550.986	0.0516144	550.986	0.0990904	451.018	0.098577	451.018	0.116979
550.008	0.00714831	550.008	0.053646	550.008	0.101431	449.981	0.0974402	449.981	0.11662
548.993	0.00658266	548.993	0.0560158	548.993	0.103248	448.983	0.0966232	448.983	0.116527
548.014	0.00570163	548.014	0.0579403	548.014	0.105689	447.984	0.0960656	447.984	0.116631
546.998	0.00581558	546.998	0.0601283	546.998	0.106898	446.985	0.0954856	446.985	0.11669
545.982	0.00576157	545.982	0.0621302	545.982	0.109352	445.986	0.0948071	445.986	0.116719
545.003	0.00504181	545.003	0.0645384	545.003	0.110742	444.987	0.0945149	444.987	0.117205
543.986	0.00459881	543.986	0.0666204	543.986	0.11194	443.988	0.0939655	443.988	0.117165
543.007	0.00430409	543.007	0.0677663	543.007	0.112703	442.988	0.0934944	442.988	0.117466
541.99	0.00400702	541.99	0.069609	541.99	0.113502	441.988	0.0934993	441.988	0.118418
541.01	0.0049874	541.01	0.0712024	541.01	0.114122	440.988	0.0933661	440.988	0.119177
539.992	0.00491637	539.992	0.0732621	539.992	0.114663	439.988	0.0936039	439.988	0.119485
539.012	0.00417015	539.012	0.0744684	539.012	0.114991	438.988	0.0933818	438.988	0.120288
537.994	0.0037473	537.994	0.0754873	537.994	0.11507	437.988	0.0936222	437.988	0.120817
537.013	0.00368025	537.013	0.0769747	537.013	0.115299	436.987	0.0942455	436.987	0.121906
535.994	0.00440023	535.994	0.0776837	535.994	0.114708	435.986	0.0944968	435.986	0.122595
535.013	0.00353385	535.013	0.0790911	535.013	0.114622	434.985	0.095509	434.985	0.123706
533.994	0.00335366	533.994	0.0798226	533.994	0.114259	433.984	0.0960966	433.984	0.124745
533.012	0.00449127	533.012	0.0806676	533.012	0.11375	432.983	0.0973822	432.983	0.125866
531.993	0.00479841	531.993	0.0810217	531.993	0.113282	431.981	0.0986288	431.981	0.127105
531.011	0.00405237	531.011	0.081945	531.011	0.112276	431.018	0.0997404	431.018	0.128412
529.991	0.00371636	529.991	0.0823188	529.991	0.111866	430.016	0.100957	430.016	0.129401
529.008	0.00452972	529.008	0.0823674	529.008	0.110993	429.014	0.102494	429.014	0.131398
527.988	0.0062118	527.988	0.0827825	527.988	0.110131	428.012	0.104423	428.012	0.1335
527.005	0.00608056	527.005	0.082848	527.005	0.10989	427.009	0.105963	427.009	0.135535
525.984	0.00619329	525.984	0.0832187	525.984	0.109056	426.007	0.107404	426.007	0.137656
525	0.00685733	525	0.0829582	525	0.108067	425.004	0.108615	425.004	0.139815
524.017	0.00701549	524.017	0.082917	524.017	0.107614	424.001	0.110029	424.001	0.142505
522.995	0.00698971	522.995	0.0833099	522.995	0.107282	422.998	0.110802	422.998	0.145335
522.011	0.00748986	522.011	0.0827023	522.011	0.106351	421.995	0.111573	421.995	0.148229
520.989	0.0080062	520.989	0.0816678	520.989	0.105323	420.991	0.112531	420.991	0.151454
520.005	0.00788815	520.005	0.0819104	520.005	0.105228	419.988	0.112397	419.988	0.153828
518.982	0.00835068	518.982	0.0815755	518.982	0.104513	418.984	0.112116	418.984	0.156442
517.997	0.00956082	517.997	0.0810677	517.997	0.103898	418.019	0.112027	418.019	0.159727
517.012	0.010161	517.012	0.0805501	517.012	0.103464	417.014	0.111308	417.014	0.162862
515.989	0.0102403	515.989	0.0801217	515.989	0.102958	416.01	0.110611	416.01	0.165304
515.003	0.0103799	515.003	0.0802295	515.003	0.102864	415.006	0.109675	415.006	0.167658
514.018	0.0107436	514.018	0.0800083	514.018	0.102368	414.001	0.108313	414.001	0.169557
512.994	0.0112037	512.994	0.0788858	512.994	0.101965	412.996	0.107103	412.996	0.171208
512.008	0.0114441	512.008	0.078916	512.008	0.10121	411.991	0.105567	411.991	0.17196
510.983	0.0117924	510.983	0.0788175	510.983	0.101187	410.986	0.104758	410.986	0.172345
509.997	0.0124355	509.997	0.0782324	509.997	0.100102	409.981	0.103206	409.981	0.172401
509.01	0.0126593	509.01	0.0779944	509.01	0.099458	409.014	0.102208	409.014	0.172161
507.985	0.0129854	507.985	0.0776698	507.985	0.0986727	408.008	0.101447	408.008	0.171649
506.998	0.0130459	506.998	0.0773505	506.998	0.0983132	407.003	0.100433	407.003	0.171312
506.01	0.013282	506.01	0.0771479	506.01	0.0976106	405.997	0.0996175	405.997	0.171022
504.985	0.0132965	504.985	0.0771531	504.985	0.0969084	404.991	0.09892	404.991	0.170384
503.997	0.0137996	503.997	0.0768827	503.997	0.0955094	403.984	0.0985566	403.984	0.170648
503.009	0.0141852	503.009	0.0761606	503.009	0.0945979	403.017	0.0975476	403.017	0.170246
501.983	0.0139574	501.983	0.0761845	501.983	0.0939042	402.01	0.0967394	402.01	0.170597
500.994	0.0141049	500.994	0.0754949	500.994	0.092195	401.003	0.0964463	401.003	0.171334
500.006	0.0141327	500.006	0.0750072	500.006	0.0912443	399.996	0.0959397	399.996	0.171911
499.017	0.0140755	499.017	0.0748924	499.017	0.0900004	398.989	0.095044	398.989	0.172893
497.99	0.0146074	497.99	0.0738268	497.99	0.0879452	397.982	0.0948073	397.982	0.174758
497	0.0146267	497	0.0736933	497	0.0869262	397.013	0.0938876	397.013	0.17623
496.011	0.0148396	496.011	0.0730101	496.011	0.0854533	396.006	0.0928774	396.006	0.178386
494.983	0.0146924	494.983	0.0724016	494.983	0.0841056	394.998	0.0917457	394.998	0.179278
493.993	0.0142813	493.993	0.0715396	493.993	0.0826855	393.99	0.0907836	393.99	0.181587
493.003	0.0133624	493.003	0.0707284	493.003	0.0815079	392.982	0.0893984	392.982	0.184303
492.013	0.0139832	492.013	0.069992	492.013	0.0797359	392.013	0.0885459	392.013	0.186181
490.984	0.0150908	490.984	0.0688516	490.984	0.0782811	391.004	0.0875984	391.004	0.189473
489.994	0.0140262	489.994	0.0678836	489.994	0.0771733	389.996	0.0864058	389.996	0.191401
489.003	0.0131774	489.003	0.0669771	489.003	0.0761409	388.987	0.0859999	388.987	0.195136
488.012	0.0136351	488.012	0.0661954	488.012	0.0749773	388.017	0.085975	388.017	0.199132
486.982	0.0142003	486.982	0.0650529	486.982	0.0740299	387.008	0.0858989	387.008	0.203254
485.991	0.0129825	485.991	0.0642013	485.991	0.0729441	385.999	0.0861525	385.999	0.209848
484.999	0.0125258	484.999	0.0628159	484.999	0.07189	384.989	0.087137	384.989	0.214595
484.007	0.0135778	484.007	0.0619316	484.007	0.0715921	384.019	0.0890961	384.019	0.221108
483.015	0.0144028	483.015	0.0608993	483.015	0.070119	383.009	0.0918617	383.009	0.229291
481.984	0.0136876	481.984	0.0600565	481.984	0.0693864	381.999	0.0948779	381.999	0.238406
480.992	0.0135558	480.992	0.0591461	480.992	0.0685375	380.989	0.0993856	380.989	0.248914
479.999	0.0131603	479.999	0.0584454	479.999	0.067714	380.018	0.105107	380.018	0.259986
479.006	0.0130409	479.006	0.0573011	479.006	0.0669016	379.008	0.111438	379.008	0.273594
478.013	0.0131005	478.013	0.0564938	478.013	0.0662516	377.998	0.120552	377.998	0.283587
476.982	0.0132579	476.982	0.0557309	476.982	0.0658132	376.987	0.130031	376.987	0.295991
475.988	0.013638	475.988	0.0546481	475.988	0.064516	376.015	0.13946	376.015	0.312897
474.995	0.0134977	474.995	0.0543112	474.995	0.0640576	375.004	0.154214	375.004	0.327866
474.001	0.0136542	474.001	0.0536035	474.001	0.0633289	373.993	0.166495	373.993	0.3412
473.007	0.0141184	473.007	0.0525545	473.007	0.06216	372.982	0.18462	372.982	0.356551
472.012	0.0148725	472.012	0.0513212	472.012	0.0609795	372.01	0.202647	372.01	0.375349
471.018	0.0149882	471.018	0.0506944	471.018	0.0604247	370.998	0.221563	370.998	0.392275
469.985	0.0153877	469.985	0.0502658	469.985	0.0593475	369.987	0.242926	369.987	0.405562
468.99	0.0157013	468.99	0.0496904	468.99	0.0584041	369.014	0.272732	369.014	0.423787
467.995	0.0160391	467.995	0.0487965	467.995	0.0574029	368.002	0.297479	368.002	0.447256
467	0.0166881	467	0.0481693	467	0.0566029	366.99	0.320357	366.99	0.465156
466.005	0.0171333	466.005	0.0469325	466.005	0.0554174	366.017	0.34611	366.017	0.483391
465.009	0.0174892	465.009	0.0463536	465.009	0.0544857	365.004	0.377816	365.004	0.502488
464.013	0.01805	464.013	0.0453171	464.013	0.0534114	363.992	0.400234	363.992	0.523322
463.017	0.0187763	463.017	0.0439537	463.017	0.0521632	363.018	0.426744	363.018	0.541914
461.983	0.0183937	461.983	0.0432034	461.983	0.0514766	362.005	0.454306	362.005	0.559792
460.986	0.0189558	460.986	0.0420098	460.986	0.0504763	360.993	0.473901	360.993	0.57592
459.99	0.0200179	459.99	0.0410775	459.99	0.0497814	360.018	0.492428	360.018	0.583638
458.993	0.020728	458.993	0.0403783	458.993	0.049256	359.005	0.515272	359.005	0.591461
457.996	0.0208806	457.996	0.0393066	457.996	0.0483361	357.992	0.52392	357.992	0.59309
456.999	0.0214052	456.999	0.0377184	456.999	0.0473334	357.017	0.532929	357.017	0.589637
456.002	0.02177	456.002	0.0368973	456.002	0.0466997	356.004	0.537217	356.004	0.581195
455.004	0.0218329	455.004	0.0362845	455.004	0.046257	354.99	0.539187	354.99	0.572187
454.007	0.0219472	454.007	0.0353291	454.007	0.0457744	354.015	0.53799	354.015	0.558966
453.009	0.0222273	453.009	0.0344889	453.009	0.0455398	353.001	0.534764	353.001	0.544155
452.011	0.0229456	452.011	0.0334987	452.011	0.0448184	351.987	0.529099	351.987	0.531985
451.013	0.023025	451.013	0.0327367	451.013	0.0446787	351.011	0.522233	351.011	0.517291
450.014	0.0232213	450.014	0.0320732	450.014	0.0440671	349.997	0.514873	349.997	0.506126
449.016	0.0232676	449.016	0.0312137	449.016	0.0438202	348.982	0.507426	348.982	0.495382
448.017	0.0234049	448.017	0.030298	448.017	0.0438026	348.007	0.500308	348.007	0.48893
447.018	0.0236957	447.018	0.0300415	447.018	0.0437156	346.992	0.494604	346.992	0.483805
446.019	0.0243002	446.019	0.0293196	446.019	0.0432691	346.016	0.486442	346.016	0.479244
444.981	0.024752	444.981	0.028419	444.981	0.0433538	345	0.479124	345	0.476333
443.981	0.0250222	443.981	0.027945	443.981	0.0431869	343.985	0.471262	343.985	0.474307
442.982	0.0250174	442.982	0.027318	442.982	0.0432781	343.009	0.464273	343.009	0.472782
441.982	0.0251582	441.982	0.0266189	441.982	0.0436661	341.993	0.457882	341.993	0.470687
440.982	0.0255772	440.982	0.0263409	440.982	0.043627	341.016	0.45	341.016	0.468906
439.982	0.0258718	439.982	0.0258626	439.982	0.0438855	340	0.4443	340	0.466754
438.981	0.0261096	438.981	0.0255908	438.981	0.0441283	338.984	0.437196	338.984	0.463115
437.981	0.0264271	437.981	0.0251434	437.981	0.0443451	338.007	0.430321	338.007	0.459894
437.018	0.0262017	437.018	0.0252132	437.018	0.0448679	336.991	0.423441	336.991	0.455612
436.018	0.0261901	436.018	0.0251196	436.018	0.0451747	336.014	0.416444	336.014	0.450971
435.016	0.0261373	435.016	0.0250053	435.016	0.0455802	334.997	0.410644	334.997	0.446907
434.015	0.0263443	434.015	0.025079	434.015	0.0461703	333.98	0.402591	333.98	0.442692
433.014	0.0265271	433.014	0.0251242	433.014	0.0467382	333.003	0.397364	333.003	0.437089
432.012	0.026519	432.012	0.0254265	432.012	0.0473447	331.986	0.391795	331.986	0.433685
431.01	0.0266268	431.01	0.0256737	431.01	0.0477827	331.008	0.385348	331.008	0.429628
430.008	0.026614	430.008	0.0258729	430.008	0.0487393	329.991	0.380597	329.991	0.42735
429.006	0.0264981	429.006	0.0267369	429.006	0.0493118	329.012	0.376641	329.012	0.424962
428.004	0.0264446	428.004	0.0272408	428.004	0.0505266	327.995	0.371241	327.995	0.423469
427.001	0.0265096	427.001	0.0276993	427.001	0.0514931	327.016	0.368047	327.016	0.423422
425.999	0.0264889	425.999	0.02854	425.999	0.0527289	325.999	0.36339	325.999	0.422984
424.996	0.026731	424.996	0.0288238	424.996	0.054085	324.981	0.359078	324.981	0.422935
423.993	0.0270411	423.993	0.0293911	423.993	0.055659	324.002	0.355274	324.002	0.423819
422.989	0.0268241	422.989	0.0304595	422.989	0.0571591	322.984	0.350881	322.984	0.425629
421.986	0.0268365	421.986	0.0310511	421.986	0.0590496	322.005	0.346971	322.005	0.426824
420.982	0.0270322	420.982	0.0314528	420.982	0.0603119	320.986	0.341362	320.986	0.428308
420.017	0.0273143	420.017	0.0320437	420.017	0.0615607	320.007	0.337805	320.007	0.428875
419.013	0.0273145	419.013	0.0327751	419.013	0.0632971	318.988	0.332714	318.988	0.431185
418.009	0.0272834	418.009	0.0333227	418.009	0.0652269	318.009	0.328767	318.009	0.431457
417.005	0.027716	417.005	0.0335521	417.005	0.0659754	316.99	0.324459	316.99	0.432741
416.001	0.0278359	416.001	0.0336312	416.001	0.0670494	316.01	0.319374	316.01	0.433195
414.996	0.0275589	414.996	0.0341954	414.996	0.0679408	314.991	0.316294	314.991	0.434178
413.991	0.0277878	413.991	0.0341642	413.991	0.0681804	314.011	0.313337	314.011	0.436753
412.987	0.0277821	412.987	0.0343285	412.987	0.0682428	312.991	0.31028	312.991	0.438099
411.981	0.0273347	411.981	0.0345379	411.981	0.0681624	312.011	0.308921	312.011	0.441324
411.015	0.0273678	411.015	0.0344052	411.015	0.0673506	310.991	0.306775	310.991	0.445459
410.01	0.0277273	410.01	0.0341969	410.01	0.0666049	310.011	0.307559	310.011	0.450567
409.004	0.0277001	409.004	0.0339059	409.004	0.0655828	308.991	0.30556	308.991	0.454751
407.998	0.0273567	407.998	0.0338505	407.998	0.0646065	308.01	0.30682	308.01	0.458023
406.992	0.0270774	406.992	0.0337808	406.992	0.0636454	306.99	0.309575	306.99	0.467752
405.986	0.0269777	405.986	0.0334079	405.986	0.062729	306.009	0.310875	306.009	0.475919
405.019	0.0272385	405.019	0.0328666	405.019	0.0619525	304.988	0.311365	304.988	0.484391
404.012	0.0272347	404.012	0.0327796	404.012	0.0611818	304.007	0.319907	304.007	0.498993
403.006	0.0269672	403.006	0.0325724	403.006	0.0607917	302.986	0.319457	302.986	0.503435
401.999	0.0271401	401.999	0.0320007	401.999	0.0602533	302.005	0.325458	302.005	0.519071
400.992	0.0267916	400.992	0.0319195	400.992	0.0602215	300.984	0.334065	300.984	0.539665
399.985	0.0269382	399.985	0.0316004	399.985	0.0601098	300.002	0.336909	300.002	0.560457
399.017	0.0267433	399.017	0.0318158	399.017	0.0603209	298.981	0.356615	298.981	0.598235
398.009	0.0270706	398.009	0.0313729	398.009	0.0610413	297.999	0.362482	297.999	0.605757
397.002	0.026429	397.002	0.0317288	397.002	0.0618739	297.017	0.381023	297.017	0.637558
395.994	0.0264795	395.994	0.0315038	395.994	0.0624994	295.996	0.398912	295.996	0.643282
394.986	0.0262256	394.986	0.0316647	394.986	0.0635144	295.013	0.45059	295.013	0.708264
394.017	0.0267835	394.017	0.0317516	394.017	0.0645231	293.992	0.439588	293.992	0.817133
393.009	0.0264907	393.009	0.0317373	393.009	0.0658713	293.009	0.478747	293.009	0.839574
392	0.0262812	392	0.0320759	392	0.0674806	291.987	0.480239	291.987	0.873063
390.992	0.0274261	390.992	0.0317384	390.992	0.0686879	291.004	0.502535	291.004	0.942815
389.983	0.027434	389.983	0.0321389	389.983	0.0702136	289.982	0.525095	289.982	0.975723
389.013	0.0272813	389.013	0.0323185	389.013	0.0725429	288.999	0.508887	288.999	0.988539
388.004	0.0273193	388.004	0.0323288	388.004	0.0753967	288.016	0.496877	288.016	1.05114
386.995	0.02803	386.995	0.0321832	386.995	0.0775476	286.994	0.534582	286.994	1.08419
385.986	0.0279998	385.986	0.0327172	385.986	0.0819518	286.01	0.477683	286.01	1.06797
385.015	0.0282676	385.015	0.0330701	385.015	0.0852925	284.987	0.548304	284.987	1.05596
384.006	0.0288791	384.006	0.0333244	384.006	0.0903352	284.004	0.547575	284.004	0.962351
382.996	0.0295903	382.996	0.0341941	382.996	0.0951691	282.981	0.539297	282.981	0.842236
381.986	0.0297049	381.986	0.035376	381.986	0.101896	281.997	0.45444	281.997	0.937367
381.015	0.0302882	381.015	0.0371629	381.015	0.108349	281.013	0.373102	281.013	0.397333
380.005	0.0309359	380.005	0.0385298	380.005	0.114995	279.99	0.0346805	279.99	0.2297
378.994	0.0315515	378.994	0.0404536	378.994	0.123503	279.006	0.103634	279.006	0.137571
377.984	0.0322084	377.984	0.0435073	377.984	0.132329	277.982	0.050872	277.982	0.246658
377.012	0.0338749	377.012	0.0475168	377.012	0.140073	276.998	0.10488	276.998	-0.11296
376.001	0.0346603	376.001	0.0506555	376.001	0.149785	276.014	-0.0394031	276.014	-0.0890747
374.99	0.0356671	374.99	0.0552754	374.99	0.155728	274.99	0.322587	274.99	0.227082
374.018	0.0367239	374.018	0.0603178	374.018	0.164512	274.005	0.255591	274.005	0.218356
373.007	0.0372728	373.007	0.0666885	373.007	0.173978	272.981	-0.143067	272.981	-0.0118012
371.995	0.038305	371.995	0.0724023	371.995	0.181872	271.996	-0.257645	271.996	-0.0908364
370.984	0.0397406	370.984	0.0779242	370.984	0.189647	271.011	0.00281202	271.011	-0.254235
370.011	0.040053	370.011	0.0844761	370.011	0.197837	269.987	-0.150441	269.987	-0.0721701
368.999	0.0411937	368.999	0.0933565	368.999	0.206668	269.002	-0.314401	269.002	-0.170175
367.987	0.042236	367.987	0.099696	367.987	0.218096	268.017	-0.159399	268.017	-0.36531
367.014	0.0427258	367.014	0.10808	367.014	0.226962	266.992	-0.308515	266.992	-0.0886238
366.002	0.0439752	366.002	0.116062	366.002	0.237095	266.007	0.105608	266.007	0.0842656
364.989	0.0443654	364.989	0.123542	364.989	0.249149	264.982	0.107028	264.982	-0.0763686
364.016	0.0451555	364.016	0.131922	364.016	0.258505	263.996	-0.512528	263.996	-0.0518279
363.003	0.0456051	363.003	0.142997	363.003	0.268115	263.01	-0.00501789	263.01	-0.166846
361.99	0.0470831	361.99	0.149722	361.99	0.279867	261.985	-0.289407	261.985	-0.29807
361.016	0.0486184	361.016	0.158124	361.016	0.287418	260.999	-0.238522	260.999	-0.089571
360.003	0.0499274	360.003	0.166124	360.003	0.293281	260.013	-0.170187	260.013	-0.194462
358.989	0.0503157	358.989	0.177	358.989	0.297248	258.987	-0.120779	258.987	-0.254034
358.015	0.0512198	358.015	0.184833	358.015	0.298781	258.001	0.138073	258.001	0.263268
357.001	0.0530396	357.001	0.191559	357.001	0.296872	257.015	-0.0785921	257.015	-0.143673
355.988	0.053736	355.988	0.200353	355.988	0.290788	255.989	0.0966972	255.989	-0.237651
355.013	0.0543918	355.013	0.20654	355.013	0.285921	255.002	-0.0338056	255.002	-0.0404813
353.999	0.0554642	353.999	0.210834	353.999	0.275672	254.016	-0.214513	254.016	-0.455055
352.984	0.0564924	352.984	0.214377	352.984	0.266296	252.99	0.125154	252.99	-0.114406
352.009	0.0575942	352.009	0.216541	352.009	0.257839	252.003	-0.261462	252.003	-0.0958449
350.995	0.0582996	350.995	0.21708	350.995	0.248308	251.016	-0.250049	251.016	-0.321747
350.019	0.059139	350.019	0.216002	350.019	0.241266	249.989	-0.0193658	249.989	0.00918464
349.004	0.060205	349.004	0.211507	349.004	0.233681
347.989	0.0608202	347.989	0.206158	347.989	0.226902
347.013	0.0617234	347.013	0.200404	347.013	0.221385
345.998	0.0625788	345.998	0.192098	345.998	0.217986
344.983	0.0640291	344.983	0.184951	344.983	0.21403
344.007	0.0657218	344.007	0.178175	344.007	0.210781
342.991	0.0670342	342.991	0.170043	342.991	0.207572
342.014	0.0676273	342.014	0.162323	342.014	0.205319
340.998	0.0694216	340.998	0.156271	340.998	0.202143
339.982	0.0711819	339.982	0.149691	339.982	0.198882
339.005	0.0730295	339.005	0.143499	339.005	0.195326
337.989	0.075434	337.989	0.138361	337.989	0.191522
337.012	0.0783846	337.012	0.133867	337.012	0.187775
335.995	0.0820361	335.995	0.128496	335.995	0.182813
335.018	0.0856814	335.018	0.123953	335.018	0.179465
334.001	0.0912901	334.001	0.118498	334.001	0.17423
332.984	0.0983128	332.984	0.113228	332.984	0.169195
332.006	0.104283	332.006	0.108261	332.006	0.165399
330.989	0.109375	330.989	0.103702	330.989	0.162364
330.011	0.11435	330.011	0.0989828	330.011	0.159306
328.993	0.119373	328.993	0.0931821	328.993	0.155039
328.015	0.121297	328.015	0.0902573	328.015	0.154053
326.997	0.123071	326.997	0.0872162	326.997	0.152386
326.018	0.125908	326.018	0.0832848	326.018	0.150833
325	0.127302	325	0.0804898	325	0.149975
323.982	0.130329	323.982	0.0776183	323.982	0.149096
323.003	0.13343	323.003	0.0759881	323.003	0.148422
321.985	0.136908	321.985	0.0743183	321.985	0.148641
321.005	0.141401	321.005	0.0725533	321.005	0.147206
319.987	0.144605	319.987	0.072335	319.987	0.148056
319.007	0.151688	319.007	0.0705787	319.007	0.145965
317.988	0.156382	317.988	0.0718047	317.988	0.147409
317.008	0.164097	317.008	0.0682655	317.008	0.146116
315.989	0.169605	315.989	0.067909	315.989	0.146201
315.009	0.174137	315.009	0.0675828	315.009	0.146093
313.99	0.179637	313.99	0.0670449	313.99	0.144688
313.009	0.182171	313.009	0.0671444	313.009	0.146192
311.99	0.186121	311.99	0.0663412	311.99	0.146685
311.009	0.189324	311.009	0.0650124	311.009	0.148157
309.989	0.191607	309.989	0.0649928	309.989	0.150832
309.008	0.196064	309.008	0.0648015	309.008	0.15252
307.988	0.201081	307.988	0.06478	307.988	0.15324
307.007	0.205925	307.007	0.0650219	307.007	0.157014
305.987	0.212824	305.987	0.0658229	305.987	0.164081
305.006	0.22074	305.006	0.0685432	305.006	0.168412
303.985	0.235139	303.985	0.0656991	303.985	0.172067
303.003	0.245786	303.003	0.0735021	303.003	0.17792
301.983	0.265595	301.983	0.0719173	301.983	0.179783
301.001	0.286	301.001	0.0674621	301.001	0.186382
300.019	0.30807	300.019	0.0672521	300.019	0.191907
298.998	0.347766	298.998	0.0692144	298.998	0.212046
298.016	0.400885	298.016	0.0675288	298.016	0.228347
296.994	0.47274	296.994	0.0604395	296.994	0.237911
296.012	0.570615	296.012	0.0822114	296.012	0.219195
294.99	0.680226	294.99	0.0642754	294.99	0.242244
294.008	0.80001	294.008	0.0916167	294.008	0.290032
292.986	0.999379	292.986	0.0970062	292.986	0.269307
292.003	1.0683	292.003	0.116652	292.003	0.357488
290.981	1.06927	290.981	0.122819	290.981	0.379431
289.998	1.07464	289.998	0.128468	289.998	0.392796
289.015	1.1424	289.015	0.153289	289.015	0.408884
287.992	1.3153	287.992	0.130044	287.992	0.386936
287.009	1.46529	287.009	0.163004	287.009	0.443743
285.986	1.68413	285.986	0.095159	285.986	0.456593
285.003	1.92466	285.003	0.131971	285.003	0.462128
284.019	2.2088	284.019	0.137643	284.019	0.393332
282.996	2.46504	282.996	0.216402	282.996	0.510215
282.012	2.85909	282.012	0.0458211	282.012	0.360484
280.989	3.11995	280.989	0.141482	280.989	0.245876
280.005	3.31595	280.005	0.143839	280.005	0.0226181
278.981	3.40858	278.981	0.0719867	278.981	-0.0308827
277.997	3.52104	277.997	-0.0231948	277.997	0.0544081
277.012	3.60437	277.012	-0.0888495	277.012	-0.128989
275.988	3.44217	275.988	0.133663	275.988	0.0641175
275.004	3.55088	275.004	-0.0422833	275.004	-0.0408718
274.019	3.42319	274.019	0.0414324	274.019	0.0684887
272.995	3.36959	272.995	-0.007266	272.995	0.01555
272.01	3.37153	272.01	-0.00554275	272.01	0.100367
270.986	3.54717	270.986	-0.111113	270.986	0.196899
270	3.57878	270	0.00181674	270	-0.0746685
269.015	3.44816	269.015	0.0675717	269.015	-0.101543
267.991	3.32175	267.991	0.366991	267.991	0.344076
267.005	3.56805	267.005	-0.113668	267.005	-0.000569842
266.02	3.52234	266.02	0.0872412	266.02	-0.0266915
264.994	3.37652	264.994	0.00485469	264.994	0.142374
264.009	3.53864	264.009	0.00835128	264.009	-0.0227697
262.983	3.48222	262.983	-0.0521995	262.983	0.356306
261.998	3.41531	261.998	-0.015785	261.998	0.0350958
261.011	3.50928	261.011	0.0473698	261.011	-0.0158889
259.986	3.56639	259.986	0.033223	259.986	0.0783284
259	3.39292	259	0.133778	259	0.0865147
258.013	3.44309	258.013	0.194397	258.013	0.21776
256.987	3.51987	256.987	0.0924661	256.987	-0.000170607
256.001	3.62295	256.001	-0.107566	256.001	-0.00280036
255.014	3.4524	255.014	-0.0560116	255.014	0.305482
253.988	3.41106	253.988	0.101398	253.988	0.0892962
253.001	3.36349	253.001	0.026233	253.001	0.00272615
252.014	3.49307	252.014	0.0453197	252.014	-0.0538822
250.988	3.60209	250.988	0.0775704	250.988	-0.00339854
250.001	3.32864	250.001	0.0375915	250.001	0.044717

## Sheet: CD
TITLE	MtaC Kpi (RT)			MtaC_MeOH	MtaC_Kpi_40C	MtaC_Kpi_60C	MtaC_Kpi_90C
DATA TYPE
ORIGIN	JASCO
OWNER
DATE	22/06/25
TIME	11:17:15
SPECTROMETER/DATA SYSTEM	JASCO Corp., J-715, Rev. 1.00
RESOLUTION
DELTAX	-0.1
XUNITS	NANOMETERS
YUNITS	CD[mdeg]
Y2UNITS	HT[V]
FIRSTX	260
LASTX	180
NPOINTS	801
FIRSTY	3.45129
MAXY	29.3879
MINY	-27.055			mdeg	mdeg	mdeg	mdeg
Wavelength (nm)	mdeg (Kpi)		Wavelength (nm)	MeOH	40	60	90
260	3.45129	244.66	260	3.76301	3.64129	3.82539	4.07471
259.9	3.45399	244.663	259.9	3.7571	3.63374	3.82676	4.0712
259.8	3.45592	244.669	259.8	3.75092	3.62841	3.82662	4.06935
259.7	3.45409	244.678	259.7	3.74122	3.62488	3.82477	4.07046
259.6	3.45107	244.69	259.6	3.73405	3.62455	3.82544	4.0724
259.5	3.4493	244.705	259.5	3.72679	3.62785	3.8283	4.07006
259.4	3.44346	244.723	259.4	3.71947	3.63187	3.83121	4.06267
259.3	3.43346	244.741	259.3	3.717	3.63725	3.8312	4.06301
259.2	3.42686	244.762	259.2	3.71664	3.63696	3.8287	4.06948
259.1	3.42205	244.786	259.1	3.72066	3.6352	3.82643	4.07842
259	3.41718	244.811	259	3.72358	3.63178	3.82356	4.0853
258.9	3.41575	244.838	258.9	3.72439	3.63127	3.82183	4.0932
258.8	3.41417	244.868	258.8	3.72376	3.63962	3.82042	4.09874
258.7	3.41008	244.898	258.7	3.72363	3.64572	3.81836	4.10787
258.6	3.40797	244.932	258.6	3.72186	3.64989	3.81983	4.11553
258.5	3.40563	244.969	258.5	3.72238	3.64808	3.81959	4.1183
258.4	3.40213	245.009	258.4	3.72181	3.64527	3.81775	4.11659
258.3	3.39825	245.051	258.3	3.72149	3.64263	3.81507	4.11107
258.2	3.39714	245.096	258.2	3.71885	3.64292	3.81063	4.10444
258.1	3.39443	245.143	258.1	3.71092	3.64177	3.80825	4.10361
258	3.39161	245.192	258	3.70666	3.64081	3.8018	4.10141
257.9	3.39353	245.243	257.9	3.70288	3.63843	3.7948	4.09528
257.8	3.39699	245.297	257.8	3.69163	3.63693	3.79016	4.08197
257.7	3.39787	245.353	257.7	3.68064	3.6343	3.78885	4.07213
257.6	3.39658	245.411	257.6	3.67672	3.63111	3.789	4.06338
257.5	3.39798	245.472	257.5	3.67864	3.63236	3.7903	4.05909
257.4	3.40025	245.535	257.4	3.684	3.63901	3.79179	4.05657
257.3	3.40493	245.6	257.3	3.68622	3.64407	3.79568	4.04939
257.2	3.40482	245.669	257.2	3.68495	3.64328	3.79726	4.04382
257.1	3.39688	245.741	257.1	3.68756	3.64168	3.79639	4.03779
257	3.38861	245.815	257	3.69017	3.64079	3.79192	4.02929
256.9	3.38279	245.892	256.9	3.69166	3.64049	3.78829	4.01708
256.8	3.37828	245.972	256.8	3.69346	3.64285	3.78488	4.00847
256.7	3.37586	246.055	256.7	3.69359	3.64361	3.77978	3.99721
256.6	3.37638	246.138	256.6	3.69146	3.64325	3.7741	3.99176
256.5	3.38017	246.222	256.5	3.68716	3.64114	3.76662	3.9911
256.4	3.38624	246.304	256.4	3.68155	3.63901	3.76291	3.98969
256.3	3.38874	246.384	256.3	3.67828	3.63467	3.76125	3.98575
256.2	3.39195	246.464	256.2	3.67283	3.62959	3.75793	3.97779
256.1	3.39665	246.543	256.1	3.66793	3.62286	3.75486	3.97363
256	3.40326	246.622	256	3.67147	3.61512	3.74794	3.9711
255.9	3.40951	246.702	255.9	3.6735	3.60318	3.74453	3.96636
255.8	3.41556	246.782	255.8	3.67393	3.59396	3.74588	3.96227
255.7	3.42364	246.862	255.7	3.67045	3.58755	3.7462	3.95576
255.6	3.4279	246.945	255.6	3.6684	3.58654	3.74645	3.94651
255.5	3.42449	247.027	255.5	3.66918	3.58322	3.74348	3.93391
255.4	3.41834	247.109	255.4	3.67337	3.57494	3.73913	3.92161
255.3	3.41369	247.192	255.3	3.67468	3.56591	3.73645	3.90866
255.2	3.40589	247.274	255.2	3.67207	3.55957	3.73287	3.89464
255.1	3.39846	247.355	255.1	3.66909	3.56135	3.73244	3.88335
255	3.39618	247.434	255	3.66427	3.56323	3.73329	3.87886
254.9	3.39514	247.514	254.9	3.65645	3.56496	3.73132	3.87664
254.8	3.39374	247.595	254.8	3.6518	3.56592	3.73019	3.87589
254.7	3.39442	247.676	254.7	3.64924	3.56879	3.73023	3.87043
254.6	3.39576	247.757	254.6	3.64566	3.57066	3.73257	3.86453
254.5	3.38884	247.838	254.5	3.63621	3.57139	3.7363	3.86109
254.4	3.37801	247.919	254.4	3.63249	3.57399	3.73954	3.86272
254.3	3.36606	248	254.3	3.63571	3.57348	3.73506	3.86353
254.2	3.35841	248.08	254.2	3.63138	3.57506	3.728	3.8627
254.1	3.35194	248.16	254.1	3.62329	3.57141	3.71815	3.85727
254	3.34323	248.238	254	3.61416	3.5657	3.70546	3.85208
253.9	3.32708	248.318	253.9	3.60589	3.55833	3.68684	3.84646
253.8	3.31754	248.397	253.8	3.59997	3.55412	3.66911	3.8424
253.7	3.31601	248.476	253.7	3.5902	3.55239	3.65499	3.83779
253.6	3.31539	248.555	253.6	3.58112	3.55134	3.64118	3.82997
253.5	3.31293	248.633	253.5	3.57861	3.54869	3.62947	3.8246
253.4	3.3083	248.711	253.4	3.57503	3.54483	3.61991	3.82033
253.3	3.29985	248.788	253.3	3.56899	3.54347	3.61202	3.82101
253.2	3.29184	248.865	253.2	3.56819	3.5417	3.6084	3.82031
253.1	3.28205	248.942	253.1	3.56979	3.54183	3.60818	3.81376
253	3.26675	249.019	253	3.5706	3.53963	3.60573	3.80286
252.9	3.25532	249.096	252.9	3.56826	3.54095	3.59909	3.79424
252.8	3.24525	249.175	252.8	3.56635	3.54071	3.59288	3.7877
252.7	3.23245	249.254	252.7	3.56464	3.53861	3.58577	3.77653
252.6	3.2223	249.334	252.6	3.56004	3.53861	3.57928	3.76475
252.5	3.21481	249.412	252.5	3.55396	3.54064	3.5716	3.75538
252.4	3.21101	249.49	252.4	3.54612	3.54168	3.55971	3.74151
252.3	3.2063	249.568	252.3	3.53553	3.53686	3.54988	3.72924
252.2	3.20128	249.644	252.2	3.5215	3.52734	3.54027	3.71912
252.1	3.1986	249.721	252.1	3.50654	3.52084	3.53068	3.71019
252	3.19597	249.797	252	3.49275	3.51644	3.52208	3.70303
251.9	3.19132	249.873	251.9	3.48078	3.51386	3.50901	3.69987
251.8	3.18764	249.948	251.8	3.4737	3.50834	3.49605	3.69708
251.7	3.18377	250.023	251.7	3.46394	3.50024	3.48734	3.69041
251.6	3.1773	250.099	251.6	3.45111	3.49156	3.47771	3.68199
251.5	3.16816	250.176	251.5	3.44254	3.48628	3.47189	3.6706
251.4	3.15714	250.254	251.4	3.43044	3.48022	3.46406	3.66278
251.3	3.14586	250.331	251.3	3.41729	3.46792	3.44972	3.6551
251.2	3.13971	250.407	251.2	3.40464	3.45793	3.43151	3.64389
251.1	3.13784	250.484	251.1	3.39292	3.44746	3.40791	3.63057
251	3.13632	250.561	251	3.38372	3.43498	3.38611	3.61413
250.9	3.13489	250.638	250.9	3.37011	3.4231	3.36854	3.59468
250.8	3.12824	250.715	250.8	3.3605	3.40737	3.35606	3.57666
250.7	3.11834	250.791	250.7	3.35182	3.39303	3.3488	3.55957
250.6	3.1035	250.867	250.6	3.3444	3.38122	3.34288	3.54044
250.5	3.09314	250.943	250.5	3.33789	3.36967	3.33903	3.52034
250.4	3.08044	251.02	250.4	3.32799	3.3567	3.33707	3.49719
250.3	3.0655	251.097	250.3	3.31781	3.33892	3.33311	3.47527
250.2	3.04899	251.173	250.2	3.30804	3.32106	3.33136	3.45623
250.1	3.03278	251.249	250.1	3.29009	3.30506	3.32697	3.43632
250	3.01425	251.326	250	3.27007	3.29097	3.3225	3.41721
249.9	2.9968	251.404	249.9	3.2572	3.27545	3.31546	3.39549
249.8	2.97862	251.481	249.8	3.24704	3.25795	3.3068	3.37028
249.7	2.95861	251.558	249.7	3.23571	3.24219	3.29246	3.34775
249.6	2.93965	251.635	249.6	3.22617	3.22834	3.27575	3.32949
249.5	2.9206	251.711	249.5	3.2186	3.21361	3.26145	3.31158
249.4	2.90368	251.788	249.4	3.20739	3.19603	3.24647	3.2934
249.3	2.89299	251.864	249.3	3.19386	3.17782	3.23177	3.27715
249.2	2.88142	251.941	249.2	3.17759	3.15543	3.21979	3.26131
249.1	2.86927	252.017	249.1	3.15928	3.13306	3.20647	3.24039
249	2.8587	252.094	249	3.14519	3.1093	3.19119	3.22024
248.9	2.84565	252.17	248.9	3.13443	3.08555	3.17787	3.20135
248.8	2.82959	252.248	248.8	3.12476	3.06086	3.16201	3.18374
248.7	2.80772	252.325	248.7	3.11537	3.03308	3.14836	3.16712
248.6	2.78722	252.404	248.6	3.10494	3.0081	3.13415	3.14488
248.5	2.77426	252.483	248.5	3.09576	2.98583	3.12514	3.11989
248.4	2.76464	252.564	248.4	3.08384	2.96319	3.1166	3.09469
248.3	2.75488	252.645	248.3	3.07239	2.93874	3.10424	3.07248
248.2	2.74254	252.725	248.2	3.06308	2.91444	3.08985	3.04568
248.1	2.73428	252.804	248.1	3.04747	2.88776	3.07231	3.0193
248	2.72591	252.883	248	3.03074	2.85911	3.05414	2.98943
247.9	2.71307	252.963	247.9	3.01401	2.83256	3.0358	2.95732
247.8	2.69481	253.043	247.8	2.99762	2.80387	3.01855	2.925
247.7	2.67536	253.124	247.7	2.98268	2.77703	3.00093	2.8932
247.6	2.65813	253.204	247.6	2.9661	2.75234	2.98035	2.85925
247.5	2.63778	253.287	247.5	2.95204	2.72966	2.95689	2.8274
247.4	2.62042	253.368	247.4	2.93423	2.71297	2.93025	2.79895
247.3	2.6045	253.452	247.3	2.91532	2.69647	2.9026	2.77221
247.2	2.59588	253.536	247.2	2.89755	2.6758	2.87519	2.74414
247.1	2.59254	253.62	247.1	2.87649	2.65084	2.84914	2.71566
247	2.59007	253.705	247	2.86067	2.62673	2.82571	2.68954
246.9	2.58786	253.789	246.9	2.8468	2.60794	2.80034	2.664
246.8	2.58572	253.872	246.8	2.82853	2.59242	2.77333	2.63825
246.7	2.57746	253.955	246.7	2.81045	2.57493	2.74741	2.61607
246.6	2.56892	254.04	246.6	2.79282	2.55566	2.7154	2.59507
246.5	2.56549	254.126	246.5	2.772	2.53713	2.68201	2.57433
246.4	2.55998	254.213	246.4	2.74438	2.52335	2.64843	2.55434
246.3	2.55143	254.301	246.3	2.71806	2.50792	2.6158	2.53331
246.2	2.54239	254.389	246.2	2.69281	2.49114	2.58713	2.51265
246.1	2.53391	254.478	246.1	2.66807	2.4713	2.56022	2.49087
246	2.51986	254.568	246	2.6453	2.45277	2.53775	2.46795
245.9	2.50101	254.657	245.9	2.62264	2.43291	2.51512	2.44202
245.8	2.4758	254.747	245.8	2.5997	2.40947	2.48809	2.41689
245.7	2.45067	254.837	245.7	2.57821	2.38667	2.45764	2.39239
245.6	2.42047	254.927	245.6	2.55763	2.36551	2.42601	2.36214
245.5	2.39224	255.018	245.5	2.53475	2.35013	2.38831	2.32723
245.4	2.36866	255.109	245.4	2.50951	2.336	2.35433	2.29283
245.3	2.35063	255.201	245.3	2.48404	2.32238	2.32319	2.26073
245.2	2.33169	255.293	245.2	2.45889	2.30584	2.29385	2.23103
245.1	2.30799	255.384	245.1	2.42798	2.28555	2.26383	2.19726
245	2.28421	255.475	245	2.39526	2.26303	2.23237	2.15917
244.9	2.26578	255.567	244.9	2.36503	2.23742	2.19992	2.11534
244.8	2.2479	255.66	244.8	2.33833	2.21547	2.16653	2.07485
244.7	2.2243	255.755	244.7	2.31565	2.19755	2.13192	2.03651
244.6	2.20118	255.848	244.6	2.29311	2.17737	2.09733	2.00485
244.5	2.18205	255.941	244.5	2.268	2.15878	2.069	1.97567
244.4	2.16312	256.034	244.4	2.23988	2.13711	2.04442	1.94594
244.3	2.14268	256.129	244.3	2.21477	2.112	2.02341	1.91635
244.2	2.12121	256.226	244.2	2.19392	2.08153	2.00641	1.89082
244.1	2.10101	256.322	244.1	2.16709	2.05103	1.98591	1.86364
244	2.07652	256.42	244	2.13354	2.02214	1.95894	1.83102
243.9	2.05364	256.517	243.9	2.0986	1.99422	1.92825	1.7947
243.8	2.02432	256.614	243.8	2.05875	1.96416	1.89631	1.75443
243.7	1.98806	256.712	243.7	2.02781	1.94039	1.86643	1.71764
243.6	1.95182	256.811	243.6	1.99269	1.91585	1.83437	1.67719
243.5	1.91344	256.912	243.5	1.95524	1.89003	1.80366	1.6339
243.4	1.87296	257.013	243.4	1.92133	1.8574	1.77349	1.59358
243.3	1.84127	257.116	243.3	1.89047	1.8247	1.74108	1.55309
243.2	1.8126	257.219	243.2	1.85929	1.79069	1.70916	1.51164
243.1	1.78154	257.322	243.1	1.8277	1.75609	1.68194	1.46906
243	1.74774	257.425	243	1.80045	1.71795	1.65255	1.42622
242.9	1.71452	257.528	242.9	1.77087	1.6829	1.61916	1.38562
242.8	1.67393	257.633	242.8	1.73786	1.64754	1.58486	1.34307
242.7	1.63182	257.737	242.7	1.70133	1.61414	1.54742	1.29633
242.6	1.59265	257.841	242.6	1.66428	1.57769	1.50888	1.24988
242.5	1.55698	257.949	242.5	1.63235	1.54052	1.47425	1.20232
242.4	1.5261	258.058	242.4	1.60515	1.50939	1.44024	1.15702
242.3	1.49616	258.168	242.3	1.57583	1.47659	1.40614	1.11622
242.2	1.46824	258.277	242.2	1.53953	1.43994	1.37474	1.07761
242.1	1.43581	258.389	242.1	1.50328	1.39836	1.34307	1.03964
242	1.40107	258.501	242	1.46388	1.35658	1.31011	0.997764
241.9	1.36645	258.614	241.9	1.42636	1.31363	1.27076	0.950097
241.8	1.32871	258.728	241.8	1.39149	1.26963	1.22252	0.903682
241.7	1.29056	258.842	241.7	1.35755	1.22703	1.17694	0.863671
241.6	1.25275	258.958	241.6	1.32107	1.19058	1.13341	0.82727
241.5	1.21123	259.074	241.5	1.28286	1.15898	1.08935	0.794984
241.4	1.16785	259.192	241.4	1.2452	1.11919	1.04519	0.763168
241.3	1.12536	259.31	241.3	1.20133	1.07282	1.00561	0.727212
241.2	1.08024	259.432	241.2	1.15898	1.02888	0.969465	0.681667
241.1	1.03348	259.554	241.1	1.11826	0.984902	0.92814	0.640258
241	0.993602	259.678	241	1.08203	0.94231	0.882179	0.600795
240.9	0.960079	259.803	240.9	1.03514	0.898394	0.836195	0.559945
240.8	0.923992	259.93	240.8	0.982873	0.858318	0.789438	0.510133
240.7	0.883058	260.057	240.7	0.931297	0.815949	0.742742	0.460092
240.6	0.842968	260.184	240.6	0.88615	0.768632	0.702754	0.412372
240.5	0.803859	260.313	240.5	0.838752	0.720747	0.66204	0.363637
240.4	0.767835	260.443	240.4	0.792301	0.672344	0.61991	0.318683
240.3	0.730572	260.576	240.3	0.735608	0.614519	0.569938	0.274947
240.2	0.691065	260.71	240.2	0.680233	0.556596	0.516884	0.232388
240.1	0.650424	260.846	240.1	0.625575	0.49913	0.463838	0.187492
240	0.61122	260.983	240	0.572232	0.440456	0.406786	0.135366
239.9	0.565457	261.121	239.9	0.520133	0.382	0.348171	0.0805426
239.8	0.521085	261.261	239.8	0.468987	0.324783	0.296258	0.0239176
239.7	0.473697	261.404	239.7	0.424815	0.265743	0.241407	-0.0340164
239.6	0.426238	261.547	239.6	0.38004	0.209209	0.188062	-0.0906295
239.5	0.375859	261.695	239.5	0.33601	0.158255	0.140659	-0.15077
239.4	0.330464	261.843	239.4	0.288854	0.106748	0.0901985	-0.215341
239.3	0.288301	261.994	239.3	0.243486	0.0518769	0.0385171	-0.27535
239.2	0.248035	262.146	239.2	0.201451	-0.000402331	-0.0114399	-0.333199
239.1	0.204086	262.299	239.1	0.156297	-0.0504959	-0.0698781	-0.384926
239	0.156697	262.456	239	0.102995	-0.0983238	-0.12821	-0.439579
238.9	0.108895	262.613	238.9	0.0503582	-0.145384	-0.186936	-0.498586
238.8	0.0641984	262.773	238.8	-0.00632346	-0.192776	-0.249115	-0.557575
238.7	0.023101	262.934	238.7	-0.0671184	-0.241187	-0.310994	-0.620956
238.6	-0.0175416	263.098	238.6	-0.121354	-0.291283	-0.373382	-0.683822
238.5	-0.0629646	263.265	238.5	-0.179424	-0.339622	-0.431051	-0.743308
238.4	-0.106753	263.433	238.4	-0.243591	-0.385327	-0.485032	-0.803183
238.3	-0.151246	263.602	238.3	-0.307924	-0.43478	-0.541236	-0.866803
238.2	-0.199559	263.773	238.2	-0.368543	-0.493121	-0.599336	-0.933872
238.1	-0.249986	263.948	238.1	-0.430583	-0.55951	-0.652353	-1.00431
238	-0.29934	264.125	238	-0.498375	-0.616415	-0.69903	-1.07526
237.9	-0.346937	264.304	237.9	-0.563893	-0.666549	-0.749519	-1.14507
237.8	-0.394806	264.485	237.8	-0.628506	-0.714792	-0.802022	-1.20872
237.7	-0.439184	264.67	237.7	-0.696575	-0.764425	-0.851083	-1.2801
237.6	-0.494378	264.856	237.6	-0.762424	-0.819902	-0.90557	-1.35137
237.5	-0.559393	265.045	237.5	-0.822334	-0.875601	-0.964662	-1.41809
237.4	-0.625238	265.237	237.4	-0.879564	-0.930162	-1.02831	-1.48296
237.3	-0.68538	265.43	237.3	-0.936214	-0.981499	-1.09332	-1.54755
237.2	-0.745006	265.626	237.2	-0.999867	-1.03356	-1.16079	-1.61546
237.1	-0.803661	265.824	237.1	-1.06214	-1.08982	-1.2241	-1.68399
237	-0.860162	266.024	237	-1.12552	-1.14621	-1.28346	-1.74944
236.9	-0.916095	266.225	236.9	-1.18429	-1.2009	-1.33596	-1.81523
236.8	-0.976495	266.429	236.8	-1.23815	-1.25513	-1.38702	-1.88108
236.7	-1.03951	266.635	236.7	-1.2926	-1.31036	-1.43988	-1.94329
236.6	-1.1089	266.842	236.6	-1.34983	-1.36718	-1.49058	-2.0024
236.5	-1.17917	267.051	236.5	-1.41216	-1.42397	-1.54352	-2.0579
236.4	-1.25207	267.263	236.4	-1.47069	-1.48008	-1.60093	-2.11386
236.3	-1.32904	267.476	236.3	-1.53369	-1.53879	-1.65934	-2.17456
236.2	-1.40773	267.692	236.2	-1.60802	-1.60125	-1.72419	-2.24402
236.1	-1.48059	267.907	236.1	-1.69123	-1.67117	-1.79254	-2.31731
236	-1.55001	268.123	236	-1.76999	-1.74396	-1.86179	-2.39048
235.9	-1.61713	268.342	235.9	-1.84877	-1.81587	-1.93402	-2.46662
235.8	-1.68509	268.562	235.8	-1.93056	-1.88522	-2.01088	-2.54375
235.7	-1.75466	268.784	235.7	-2.01492	-1.9593	-2.08177	-2.62558
235.6	-1.82682	269.006	235.6	-2.0927	-2.03553	-2.1521	-2.70574
235.5	-1.90208	269.229	235.5	-2.16684	-2.11315	-2.22227	-2.78566
235.4	-1.97767	269.455	235.4	-2.23423	-2.18861	-2.29042	-2.86429
235.3	-2.05671	269.68	235.3	-2.2942	-2.26977	-2.35625	-2.93489
235.2	-2.14341	269.907	235.2	-2.35778	-2.35244	-2.42179	-3.00087
235.1	-2.22831	270.133	235.1	-2.42031	-2.44128	-2.4895	-3.06591
235	-2.30836	270.361	235	-2.48334	-2.53627	-2.55196	-3.13678
234.9	-2.39173	270.591	234.9	-2.54662	-2.62631	-2.61913	-3.20536
234.8	-2.48296	270.82	234.8	-2.61094	-2.70816	-2.69139	-3.27147
234.7	-2.56831	271.051	234.7	-2.66931	-2.78733	-2.76265	-3.33256
234.6	-2.65187	271.283	234.6	-2.73141	-2.87405	-2.84118	-3.39444
234.5	-2.73697	271.516	234.5	-2.79532	-2.96538	-2.92206	-3.4613
234.4	-2.8237	271.75	234.4	-2.86752	-3.05432	-2.99797	-3.53253
234.3	-2.91006	271.984	234.3	-2.93704	-3.13993	-3.07434	-3.59755
234.2	-2.99888	272.22	234.2	-3.00833	-3.22398	-3.14892	-3.66933
234.1	-3.08199	272.456	234.1	-3.08427	-3.30664	-3.22046	-3.75012
234	-3.1631	272.693	234	-3.16507	-3.39225	-3.28775	-3.83158
233.9	-3.24886	272.933	233.9	-3.24335	-3.4758	-3.35902	-3.90998
233.8	-3.33422	273.175	233.8	-3.31795	-3.55577	-3.43282	-3.98397
233.7	-3.41807	273.42	233.7	-3.39498	-3.63719	-3.50921	-4.05792
233.6	-3.51239	273.667	233.6	-3.47053	-3.71896	-3.5897	-4.13581
233.5	-3.60619	273.917	233.5	-3.54548	-3.79836	-3.67575	-4.22326
233.4	-3.69892	274.169	233.4	-3.62745	-3.87919	-3.76079	-4.30986
233.3	-3.79383	274.424	233.3	-3.71174	-3.9646	-3.84634	-4.40566
233.2	-3.88581	274.683	233.2	-3.79614	-4.0498	-3.93208	-4.50014
233.1	-3.97365	274.942	233.1	-3.88516	-4.14229	-4.01794	-4.59241
233	-4.06274	275.202	233	-3.9791	-4.23794	-4.10601	-4.6881
232.9	-4.14964	275.464	232.9	-4.07837	-4.32042	-4.19475	-4.77936
232.8	-4.22743	275.726	232.8	-4.16749	-4.39841	-4.28526	-4.86352
232.7	-4.30898	275.99	232.7	-4.2492	-4.47665	-4.37436	-4.94603
232.6	-4.3981	276.256	232.6	-4.33585	-4.56247	-4.46501	-5.02103
232.5	-4.49185	276.522	232.5	-4.42608	-4.64464	-4.55003	-5.09377
232.4	-4.59018	276.788	232.4	-4.51357	-4.73619	-4.63372	-5.1649
232.3	-4.68688	277.054	232.3	-4.60149	-4.82921	-4.71884	-5.23524
232.2	-4.78355	277.319	232.2	-4.69692	-4.9248	-4.80754	-5.3066
232.1	-4.88108	277.584	232.1	-4.7977	-5.01592	-4.89147	-5.38058
232	-4.98034	277.849	232	-4.8971	-5.10471	-4.97777	-5.46098
231.9	-5.08109	278.114	231.9	-5.0006	-5.18995	-5.06514	-5.54844
231.8	-5.17319	278.377	231.8	-5.10829	-5.27725	-5.15704	-5.64223
231.7	-5.26341	278.64	231.7	-5.20979	-5.35538	-5.25033	-5.73127
231.6	-5.35578	278.902	231.6	-5.30447	-5.43636	-5.34704	-5.81587
231.5	-5.44997	279.165	231.5	-5.39851	-5.51708	-5.44114	-5.89992
231.4	-5.53382	279.429	231.4	-5.4998	-5.60158	-5.52881	-5.98336
231.3	-5.62383	279.693	231.3	-5.60848	-5.69014	-5.61785	-6.06908
231.2	-5.71523	279.957	231.2	-5.71804	-5.77055	-5.70983	-6.15599
231.1	-5.80377	280.222	231.1	-5.82125	-5.85413	-5.80175	-6.24154
231	-5.88992	280.49	231	-5.91798	-5.9473	-5.9005	-6.32263
230.9	-5.98334	280.76	230.9	-6.01623	-6.04112	-6.0067	-6.41116
230.8	-6.07592	281.032	230.8	-6.12142	-6.13081	-6.11258	-6.49519
230.7	-6.17428	281.305	230.7	-6.22617	-6.2249	-6.2138	-6.58031
230.6	-6.27779	281.579	230.6	-6.32972	-6.32105	-6.31811	-6.66714
230.5	-6.37843	281.855	230.5	-6.4353	-6.42227	-6.4164	-6.75553
230.4	-6.47782	282.13	230.4	-6.54084	-6.52584	-6.50929	-6.8487
230.3	-6.5857	282.403	230.3	-6.6423	-6.63054	-6.60094	-6.93462
230.2	-6.69251	282.678	230.2	-6.74113	-6.73446	-6.68788	-7.01431
230.1	-6.79527	282.951	230.1	-6.84417	-6.83632	-6.77408	-7.08654
230	-6.89722	283.223	230	-6.93956	-6.93402	-6.86232	-7.16134
229.9	-6.99784	283.493	229.9	-7.03485	-7.03064	-6.95432	-7.23154
229.8	-7.09317	283.761	229.8	-7.14058	-7.12631	-7.04882	-7.30126
229.7	-7.18566	284.027	229.7	-7.23664	-7.21292	-7.14138	-7.37882
229.6	-7.2799	284.292	229.6	-7.32632	-7.29984	-7.23145	-7.45234
229.5	-7.37463	284.555	229.5	-7.41815	-7.40838	-7.3255	-7.53369
229.4	-7.48454	284.818	229.4	-7.5095	-7.51945	-7.41082	-7.62209
229.3	-7.6007	285.08	229.3	-7.60498	-7.62931	-7.49723	-7.71022
229.2	-7.71259	285.342	229.2	-7.70158	-7.72765	-7.57936	-7.79971
229.1	-7.82135	285.609	229.1	-7.79811	-7.82858	-7.66211	-7.88851
229	-7.92552	285.879	229	-7.90351	-7.92309	-7.74575	-7.98253
228.9	-8.03223	286.154	228.9	-8.00445	-8.00958	-7.82708	-8.07901
228.8	-8.13974	286.434	228.8	-8.10832	-8.09316	-7.91176	-8.17657
228.7	-8.23833	286.721	228.7	-8.21102	-8.18192	-8.00222	-8.26836
228.6	-8.34272	287.011	228.6	-8.31106	-8.27764	-8.09537	-8.35362
228.5	-8.44611	287.304	228.5	-8.40759	-8.3698	-8.19348	-8.43785
228.4	-8.5535	287.6	228.4	-8.50326	-8.45416	-8.28972	-8.51785
228.3	-8.65759	287.896	228.3	-8.60345	-8.54288	-8.38327	-8.6009
228.2	-8.75866	288.192	228.2	-8.7051	-8.62873	-8.48222	-8.69138
228.1	-8.85276	288.486	228.1	-8.81432	-8.72317	-8.58681	-8.78945
228	-8.94681	288.777	228	-8.91983	-8.8184	-8.6915	-8.88315
227.9	-9.04685	289.064	227.9	-9.02611	-8.90367	-8.79697	-8.96869
227.8	-9.15532	289.345	227.8	-9.13167	-8.99641	-8.90388	-9.05515
227.7	-9.26491	289.621	227.7	-9.24533	-9.09651	-9.00539	-9.14311
227.6	-9.37323	289.891	227.6	-9.36354	-9.19922	-9.10076	-9.24223
227.5	-9.48294	290.157	227.5	-9.47732	-9.30245	-9.19328	-9.34142
227.4	-9.58426	290.421	227.4	-9.58683	-9.40637	-9.28536	-9.441
227.3	-9.68409	290.685	227.3	-9.69567	-9.5056	-9.37678	-9.53416
227.2	-9.78563	290.951	227.2	-9.80073	-9.59799	-9.46716	-9.62056
227.1	-9.89208	291.221	227.1	-9.90336	-9.69172	-9.55341	-9.70615
227	-9.99737	291.498	227	-10.0072	-9.7921	-9.64719	-9.78604
226.9	-10.0979	291.782	226.9	-10.1116	-9.88733	-9.74392	-9.87855
226.8	-10.199	292.07	226.8	-10.2186	-9.9898	-9.84618	-9.97607
226.7	-10.303	292.363	226.7	-10.3225	-10.0972	-9.94105	-10.0798
226.6	-10.4109	292.658	226.6	-10.4374	-10.2014	-10.0426	-10.1815
226.5	-10.5164	292.955	226.5	-10.5508	-10.295	-10.1433	-10.2825
226.4	-10.623	293.254	226.4	-10.6458	-10.388	-10.2422	-10.3808
226.3	-10.7391	293.552	226.3	-10.7485	-10.4722	-10.345	-10.4651
226.2	-10.8562	293.848	226.2	-10.8594	-10.5597	-10.4478	-10.5456
226.1	-10.965	294.14	226.1	-10.9703	-10.6381	-10.5393	-10.6263
226	-11.0639	294.428	226	-11.0852	-10.7199	-10.638	-10.6984
225.9	-11.1512	294.711	225.9	-11.2014	-10.8092	-10.7406	-10.7753
225.8	-11.2345	294.99	225.8	-11.3145	-10.9062	-10.8483	-10.8511
225.7	-11.3236	295.263	225.7	-11.4299	-10.9995	-10.9573	-10.9275
225.6	-11.4112	295.535	225.6	-11.5322	-11.0984	-11.0646	-11.006
225.5	-11.4979	295.81	225.5	-11.6292	-11.2009	-11.1771	-11.0816
225.4	-11.581	296.09	225.4	-11.719	-11.3014	-11.2852	-11.1506
225.3	-11.6639	296.376	225.3	-11.8085	-11.3964	-11.3877	-11.2185
225.2	-11.7433	296.667	225.2	-11.9059	-11.49	-11.4849	-11.2939
225.1	-11.8257	296.959	225.1	-12.0092	-11.58	-11.567	-11.3693
225	-11.8991	297.253	225	-12.1144	-11.6694	-11.6487	-11.4548
224.9	-11.979	297.545	224.9	-12.2203	-11.7593	-11.7322	-11.5461
224.8	-12.0704	297.837	224.8	-12.329	-11.8546	-11.8122	-11.6348
224.7	-12.1646	298.127	224.7	-12.4409	-11.9457	-11.8866	-11.7116
224.6	-12.2675	298.415	224.6	-12.5431	-12.0392	-11.9664	-11.791
224.5	-12.3697	298.7	224.5	-12.6399	-12.1313	-12.045	-11.8814
224.4	-12.4626	298.985	224.4	-12.7269	-12.216	-12.1186	-11.9673
224.3	-12.5523	299.27	224.3	-12.8049	-12.292	-12.1955	-12.0428
224.2	-12.6406	299.558	224.2	-12.8748	-12.363	-12.2736	-12.1075
224.1	-12.7232	299.852	224.1	-12.9533	-12.4295	-12.3473	-12.1719
224	-12.8085	300.152	224	-13.0306	-12.5012	-12.4266	-12.2461
223.9	-12.8893	300.458	223.9	-13.1093	-12.58	-12.5156	-12.3204
223.8	-12.9651	300.763	223.8	-13.1889	-12.6582	-12.6105	-12.3952
223.7	-13.0404	301.065	223.7	-13.2688	-12.7343	-12.7098	-12.4742
223.6	-13.117	301.362	223.6	-13.3508	-12.8106	-12.8008	-12.5646
223.5	-13.1991	301.656	223.5	-13.4356	-12.8931	-12.8875	-12.6472
223.4	-13.2777	301.947	223.4	-13.5173	-12.9643	-12.9701	-12.7235
223.3	-13.3529	302.234	223.3	-13.6006	-13.0324	-13.0645	-12.796
223.2	-13.4194	302.516	223.2	-13.6799	-13.099	-13.145	-12.8681
223.1	-13.4843	302.793	223.1	-13.7546	-13.1658	-13.2214	-12.9377
223	-13.5489	303.072	223	-13.8334	-13.2369	-13.2977	-13.0089
222.9	-13.6029	303.356	222.9	-13.9163	-13.3168	-13.3695	-13.0878
222.8	-13.6613	303.65	222.8	-13.9995	-13.3987	-13.4348	-13.176
222.7	-13.7331	303.956	222.7	-14.0815	-13.4826	-13.5037	-13.2523
222.6	-13.8078	304.273	222.6	-14.1652	-13.5529	-13.5665	-13.3289
222.5	-13.8852	304.6	222.5	-14.2445	-13.6133	-13.6319	-13.4008
222.4	-13.963	304.927	222.4	-14.3137	-13.6702	-13.6923	-13.4774
222.3	-14.0338	305.25	222.3	-14.3755	-13.734	-13.7611	-13.5625
222.2	-14.105	305.564	222.2	-14.4402	-13.7964	-13.8222	-13.6489
222.1	-14.176	305.868	222.1	-14.515	-13.8584	-13.8813	-13.7341
222	-14.2534	306.162	222	-14.5893	-13.9281	-13.9368	-13.8121
221.9	-14.3353	306.447	221.9	-14.6679	-14.0018	-13.994	-13.8943
221.8	-14.4205	306.727	221.8	-14.7448	-14.0706	-14.0515	-13.9723
221.7	-14.5039	307.007	221.7	-14.8184	-14.1537	-14.1209	-14.054
221.6	-14.6013	307.293	221.6	-14.8878	-14.2446	-14.1867	-14.1285
221.5	-14.7031	307.591	221.5	-14.9538	-14.3334	-14.2463	-14.1968
221.4	-14.7997	307.908	221.4	-15.0222	-14.4118	-14.3088	-14.2613
221.3	-14.8941	308.242	221.3	-15.0943	-14.4824	-14.3715	-14.3282
221.2	-14.9893	308.583	221.2	-15.1731	-14.5473	-14.4322	-14.3959
221.1	-15.0736	308.928	221.1	-15.2549	-14.6164	-14.4978	-14.4589
221	-15.15	309.271	221	-15.328	-14.6876	-14.5767	-14.5188
220.9	-15.2291	309.605	220.9	-15.4069	-14.7536	-14.6531	-14.5832
220.8	-15.3138	309.924	220.8	-15.4922	-14.818	-14.7288	-14.6539
220.7	-15.3997	310.226	220.7	-15.5655	-14.8875	-14.805	-14.7184
220.6	-15.4904	310.517	220.6	-15.6366	-14.9565	-14.8738	-14.7805
220.5	-15.58	310.805	220.5	-15.7099	-15.02	-14.9415	-14.8462
220.4	-15.6724	311.102	220.4	-15.7789	-15.0849	-15.005	-14.9164
220.3	-15.7474	311.414	220.3	-15.8552	-15.1485	-15.0588	-14.9805
220.2	-15.8142	311.741	220.2	-15.9319	-15.2101	-15.1189	-15.0387
220.1	-15.8716	312.079	220.1	-16.0051	-15.2651	-15.1772	-15.0953
220	-15.9333	312.425	220	-16.0706	-15.3254	-15.2339	-15.1627
219.9	-16.002	312.774	219.9	-16.1357	-15.389	-15.2907	-15.2278
219.8	-16.0755	313.123	219.8	-16.1912	-15.4498	-15.3572	-15.2897
219.7	-16.1399	313.465	219.7	-16.2512	-15.5141	-15.4231	-15.3451
219.6	-16.2181	313.795	219.6	-16.319	-15.5779	-15.4901	-15.4013
219.5	-16.2894	314.11	219.5	-16.3769	-15.6427	-15.5585	-15.4528
219.4	-16.351	314.417	219.4	-16.424	-15.7056	-15.6271	-15.4944
219.3	-16.4056	314.724	219.3	-16.4635	-15.7595	-15.6988	-15.5504
219.2	-16.4523	315.043	219.2	-16.5077	-15.8228	-15.769	-15.6078
219.1	-16.5068	315.375	219.1	-16.5528	-15.8912	-15.8277	-15.6658
219	-16.5609	315.714	219	-16.5984	-15.954	-15.8856	-15.7197
218.9	-16.6149	316.056	218.9	-16.649	-16.0109	-15.9328	-15.7645
218.8	-16.6681	316.402	218.8	-16.691	-16.0599	-15.9968	-15.8095
218.7	-16.7234	316.745	218.7	-16.7365	-16.1067	-16.0653	-15.8527
218.6	-16.7725	317.085	218.6	-16.7849	-16.1635	-16.1285	-15.9107
218.5	-16.8164	317.42	218.5	-16.8288	-16.2161	-16.1893	-15.9758
218.4	-16.8686	317.751	218.4	-16.8687	-16.271	-16.2537	-16.044
218.3	-16.9226	318.083	218.3	-16.9095	-16.3209	-16.3077	-16.1052
218.2	-16.9697	318.419	218.2	-16.951	-16.3646	-16.3555	-16.1625
218.1	-17.0063	318.763	218.1	-16.9998	-16.4214	-16.4072	-16.2088
218	-17.0353	319.109	218	-17.0521	-16.4786	-16.4586	-16.2397
217.9	-17.0714	319.454	217.9	-17.0935	-16.5374	-16.516	-16.2701
217.8	-17.0994	319.798	217.8	-17.1252	-16.6037	-16.5757	-16.2989
217.7	-17.1361	320.136	217.7	-17.1573	-16.6658	-16.6314	-16.3248
217.6	-17.1788	320.47	217.6	-17.2073	-16.7253	-16.6767	-16.3615
217.5	-17.2109	320.803	217.5	-17.2555	-16.7824	-16.7161	-16.3987
217.4	-17.2405	321.14	217.4	-17.2984	-16.8415	-16.7553	-16.4476
217.3	-17.2711	321.491	217.3	-17.3482	-16.8986	-16.791	-16.4947
217.2	-17.2957	321.86	217.2	-17.3983	-16.9508	-16.8276	-16.5348
217.1	-17.3168	322.236	217.1	-17.4418	-16.9959	-16.854	-16.5778
217	-17.3289	322.605	217	-17.4783	-17.0364	-16.8698	-16.62
216.9	-17.3506	322.963	216.9	-17.4993	-17.071	-16.8782	-16.6656
216.8	-17.3814	323.313	216.8	-17.5199	-17.1032	-16.8887	-16.7069
216.7	-17.418	323.654	216.7	-17.5409	-17.1363	-16.9027	-16.7451
216.6	-17.4672	323.986	216.6	-17.569	-17.1665	-16.9246	-16.7787
216.5	-17.5111	324.32	216.5	-17.5933	-17.1895	-16.9512	-16.8085
216.4	-17.5507	324.669	216.4	-17.6254	-17.2255	-16.98	-16.8427
216.3	-17.5922	325.046	216.3	-17.6539	-17.2693	-17.019	-16.8821
216.2	-17.6235	325.45	216.2	-17.6847	-17.3102	-17.0493	-16.919
216.1	-17.6527	325.863	216.1	-17.7151	-17.3353	-17.0663	-16.956
216	-17.6886	326.268	216	-17.7527	-17.3648	-17.0806	-17.0017
215.9	-17.7271	326.653	215.9	-17.8042	-17.3969	-17.0958	-17.0349
215.8	-17.7662	327.017	215.8	-17.8415	-17.4301	-17.1185	-17.067
215.7	-17.7993	327.364	215.7	-17.8672	-17.4667	-17.1438	-17.1046
215.6	-17.838	327.707	215.6	-17.8999	-17.5026	-17.161	-17.1358
215.5	-17.8718	328.061	215.5	-17.9325	-17.5255	-17.1733	-17.1675
215.4	-17.907	328.447	215.4	-17.9647	-17.5472	-17.1732	-17.1904
215.3	-17.9487	328.868	215.3	-18.0023	-17.5773	-17.1715	-17.2086
215.2	-17.9913	329.308	215.2	-18.0336	-17.5877	-17.1791	-17.2322
215.1	-18.0298	329.752	215.1	-18.0654	-17.5941	-17.1974	-17.2424
215	-18.0533	330.183	215	-18.1064	-17.6113	-17.2122	-17.2395
214.9	-18.0652	330.585	214.9	-18.1585	-17.6156	-17.2251	-17.2483
214.8	-18.0729	330.963	214.8	-18.211	-17.6144	-17.2503	-17.2578
214.7	-18.0826	331.331	214.7	-18.2488	-17.6031	-17.2857	-17.2739
214.6	-18.1056	331.719	214.6	-18.2705	-17.596	-17.3111	-17.3096
214.5	-18.1243	332.137	214.5	-18.2769	-17.5869	-17.3318	-17.3408
214.4	-18.147	332.587	214.4	-18.2884	-17.5674	-17.3411	-17.3771
214.3	-18.1608	333.054	214.3	-18.3006	-17.5485	-17.3474	-17.4092
214.2	-18.1692	333.528	214.2	-18.3104	-17.5451	-17.3506	-17.4266
214.1	-18.1881	333.991	214.1	-18.3169	-17.5584	-17.3543	-17.4437
214	-18.2063	334.431	214	-18.3284	-17.561	-17.3701	-17.4456
213.9	-18.2204	334.849	213.9	-18.3337	-17.564	-17.4004	-17.453
213.8	-18.2316	335.268	213.8	-18.3446	-17.5697	-17.4318	-17.4617
213.7	-18.2475	335.712	213.7	-18.3585	-17.5895	-17.4564	-17.4663
213.6	-18.2627	336.185	213.6	-18.3744	-17.6162	-17.4891	-17.4765
213.5	-18.278	336.67	213.5	-18.394	-17.6337	-17.535	-17.4778
213.4	-18.2787	337.165	213.4	-18.4076	-17.6345	-17.5819	-17.4811
213.3	-18.2766	337.659	213.3	-18.4238	-17.6432	-17.6328	-17.4823
213.2	-18.2676	338.146	213.2	-18.4322	-17.6492	-17.6793	-17.4806
213.1	-18.2543	338.623	213.1	-18.4398	-17.6532	-17.6989	-17.4857
213	-18.2345	339.102	213	-18.4459	-17.643	-17.7095	-17.4869
212.9	-18.231	339.595	212.9	-18.4462	-17.6304	-17.718	-17.4845
212.8	-18.2265	340.102	212.8	-18.4341	-17.6215	-17.7242	-17.4921
212.7	-18.2402	340.615	212.7	-18.4332	-17.6254	-17.7498	-17.5011
212.6	-18.2576	341.128	212.6	-18.4294	-17.6166	-17.7777	-17.5057
212.5	-18.2544	341.638	212.5	-18.4241	-17.6124	-17.8011	-17.5232
212.4	-18.2616	342.15	212.4	-18.422	-17.6065	-17.8193	-17.5431
212.3	-18.279	342.678	212.3	-18.4364	-17.5973	-17.832	-17.5609
212.2	-18.2923	343.235	212.2	-18.4479	-17.5871	-17.8524	-17.5849
212.1	-18.315	343.805	212.1	-18.4582	-17.6014	-17.8827	-17.6033
212	-18.335	344.366	212	-18.4924	-17.6301	-17.9006	-17.6105
211.9	-18.3506	344.914	211.9	-18.5241	-17.648	-17.9053	-17.6181
211.8	-18.3546	345.449	211.8	-18.5404	-17.6567	-17.92	-17.6127
211.7	-18.3622	345.974	211.7	-18.5377	-17.6613	-17.9333	-17.6138
211.6	-18.3767	346.517	211.6	-18.5166	-17.6584	-17.9464	-17.6147
211.5	-18.3912	347.106	211.5	-18.5006	-17.6672	-17.9549	-17.618
211.4	-18.4084	347.74	211.4	-18.4741	-17.6879	-17.9545	-17.6146
211.3	-18.4214	348.376	211.3	-18.4527	-17.7338	-17.94	-17.6056
211.2	-18.4379	348.984	211.2	-18.4473	-17.7623	-17.929	-17.596
211.1	-18.4537	349.558	211.1	-18.4528	-17.7805	-17.9175	-17.5882
211	-18.4721	350.112	211	-18.455	-17.801	-17.9113	-17.5781
210.9	-18.4967	350.677	210.9	-18.4404	-17.8135	-17.8989	-17.5861
210.8	-18.5145	351.294	210.8	-18.4254	-17.809	-17.8776	-17.6175
210.7	-18.521	351.967	210.7	-18.4226	-17.79	-17.8666	-17.64
210.6	-18.536	352.662	210.6	-18.4126	-17.7882	-17.8467	-17.6529
210.5	-18.5564	353.34	210.5	-18.4047	-17.7917	-17.8146	-17.6514
210.4	-18.5641	353.972	210.4	-18.3897	-17.7977	-17.7882	-17.6396
210.3	-18.5675	354.567	210.3	-18.3734	-17.7849	-17.768	-17.6215
210.2	-18.5733	355.176	210.2	-18.3573	-17.7571	-17.7384	-17.6129
210.1	-18.5813	355.84	210.1	-18.3425	-17.7357	-17.724	-17.5883
210	-18.5983	356.554	210	-18.3223	-17.732	-17.7013	-17.5576
209.9	-18.6162	357.288	209.9	-18.2829	-17.727	-17.6633	-17.5345
209.8	-18.6281	358.016	209.8	-18.2535	-17.7254	-17.6237	-17.4949
209.7	-18.6417	358.71	209.7	-18.2216	-17.7226	-17.6016	-17.4502
209.6	-18.6614	359.376	209.6	-18.1965	-17.7208	-17.569	-17.4093
209.5	-18.6717	360.064	209.5	-18.1945	-17.7378	-17.5131	-17.376
209.4	-18.687	360.799	209.4	-18.2016	-17.7599	-17.4775	-17.3249
209.3	-18.6828	361.555	209.3	-18.1971	-17.7699	-17.4367	-17.2874
209.2	-18.6719	362.32	209.2	-18.19	-17.7679	-17.4083	-17.2428
209.1	-18.6721	363.08	209.1	-18.1805	-17.7428	-17.3794	-17.191
209	-18.6791	363.832	209	-18.1611	-17.71	-17.3357	-17.1423
208.9	-18.6587	364.598	208.9	-18.1376	-17.6781	-17.2836	-17.0881
208.8	-18.634	365.39	208.8	-18.112	-17.6426	-17.2239	-17.0327
208.7	-18.615	366.191	208.7	-18.0804	-17.6027	-17.1583	-16.9621
208.6	-18.5859	366.99	208.6	-18.0257	-17.5507	-17.094	-16.8916
208.5	-18.5487	367.78	208.5	-17.9631	-17.4929	-17.0562	-16.8368
208.4	-18.5226	368.584	208.4	-17.909	-17.4496	-17.0217	-16.8082
208.3	-18.4868	369.438	208.3	-17.8703	-17.4407	-16.9906	-16.7724
208.2	-18.4423	370.329	208.2	-17.8235	-17.4193	-16.9447	-16.7361
208.1	-18.4003	371.201	208.1	-17.761	-17.394	-16.9114	-16.6856
208	-18.3739	372.041	208	-17.7152	-17.3597	-16.8818	-16.6441
207.9	-18.3581	372.86	207.9	-17.6684	-17.2933	-16.8455	-16.6241
207.8	-18.3241	373.699	207.8	-17.6164	-17.2212	-16.8117	-16.591
207.7	-18.2519	374.621	207.7	-17.5598	-17.1596	-16.7704	-16.5552
207.6	-18.1563	375.604	207.6	-17.4818	-17.1082	-16.7271	-16.519
207.5	-18.0538	376.568	207.5	-17.4296	-17.0466	-16.6704	-16.4466
207.4	-17.9821	377.47	207.4	-17.3705	-16.9759	-16.6179	-16.3795
207.3	-17.9136	378.336	207.3	-17.2834	-16.8895	-16.5577	-16.3264
207.2	-17.8239	379.238	207.2	-17.1815	-16.8008	-16.5015	-16.2832
207.1	-17.7306	380.235	207.1	-17.074	-16.6821	-16.436	-16.2245
207	-17.6339	381.287	207	-16.9619	-16.5431	-16.3575	-16.1575
206.9	-17.5338	382.324	206.9	-16.8531	-16.4028	-16.2688	-16.0877
206.8	-17.418	383.294	206.8	-16.7346	-16.273	-16.1966	-15.9674
206.7	-17.3049	384.229	206.7	-16.6124	-16.1394	-16.1064	-15.8766
206.6	-17.2036	385.23	206.6	-16.4964	-16.0266	-16.006	-15.7838
206.5	-17.0982	386.305	206.5	-16.4124	-15.9103	-15.9145	-15.6931
206.4	-16.9945	387.406	206.4	-16.3145	-15.785	-15.8224	-15.6008
206.3	-16.8765	388.49	206.3	-16.2211	-15.6489	-15.7266	-15.515
206.2	-16.7492	389.537	206.2	-16.1193	-15.5167	-15.6329	-15.4553
206.1	-16.6219	390.599	206.1	-15.9766	-15.3551	-15.5133	-15.3788
206	-16.4829	391.713	206	-15.8263	-15.1673	-15.382	-15.3194
205.9	-16.3348	392.846	205.9	-15.68	-14.9781	-15.2551	-15.2579
205.8	-16.18	393.976	205.8	-15.5319	-14.8191	-15.1027	-15.196
205.7	-16.0383	395.108	205.7	-15.365	-14.6922	-14.9445	-15.1025
205.6	-15.8802	396.283	205.6	-15.2009	-14.5524	-14.8208	-14.9872
205.5	-15.7362	397.484	205.5	-15.0296	-14.388	-14.707	-14.8526
205.4	-15.5808	398.668	205.4	-14.8552	-14.2457	-14.6019	-14.7161
205.3	-15.396	399.826	205.3	-14.6692	-14.0922	-14.4933	-14.5952
205.2	-15.2084	400.997	205.2	-14.4688	-13.9179	-14.3896	-14.4671
205.1	-15.0364	402.262	205.1	-14.2543	-13.7496	-14.247	-14.3385
205	-14.8642	403.587	205	-14.0615	-13.5905	-14.0543	-14.2218
204.9	-14.6967	404.859	204.9	-13.8919	-13.4063	-13.8383	-14.0852
204.8	-14.5232	406.068	204.8	-13.7461	-13.2437	-13.6318	-13.9191
204.7	-14.3373	407.285	204.7	-13.5978	-13.0568	-13.4203	-13.7881
204.6	-14.1235	408.626	204.6	-13.4518	-12.864	-13.2011	-13.64
204.5	-13.8893	410.049	204.5	-13.2633	-12.6505	-12.9815	-13.4774
204.4	-13.649	411.428	204.4	-13.059	-12.4337	-12.7877	-13.3553
204.3	-13.4215	412.709	204.3	-12.8423	-12.2185	-12.5988	-13.2547
204.2	-13.2053	414.009	204.2	-12.6794	-12.001	-12.4101	-13.1393
204.1	-12.9984	415.431	204.1	-12.5178	-11.813	-12.226	-12.9991
204	-12.7734	416.92	204	-12.3521	-11.6444	-12.0434	-12.7912
203.9	-12.5437	418.377	203.9	-12.1747	-11.4866	-11.8561	-12.5945
203.8	-12.3222	419.761	203.8	-11.9879	-11.303	-11.666	-12.4134
203.7	-12.1123	421.187	203.7	-11.804	-11.1356	-11.4729	-12.2703
203.6	-11.9361	422.695	203.6	-11.6525	-10.9909	-11.2966	-12.1277
203.5	-11.7619	424.228	203.5	-11.5094	-10.845	-11.1334	-11.9849
203.4	-11.5704	425.742	203.4	-11.3683	-10.6589	-10.9646	-11.9357
203.3	-11.3731	427.271	203.3	-11.2271	-10.4632	-10.7908	-11.8749
203.2	-11.1608	428.843	203.2	-11.054	-10.2324	-10.626	-11.7612
203.1	-10.9354	430.415	203.1	-10.8086	-10.0013	-10.4351	-11.6457
203	-10.7101	431.968	203	-10.5721	-9.75277	-10.2232	-11.5381
202.9	-10.4635	433.573	202.9	-10.3533	-9.51239	-9.98276	-11.3654
202.8	-10.2138	435.279	202.8	-10.1344	-9.25134	-9.74188	-11.1141
202.7	-9.98699	436.954	202.7	-9.90832	-8.98631	-9.52808	-10.8996
202.6	-9.77357	438.555	202.6	-9.66732	-8.7293	-9.32117	-10.6611
202.5	-9.57204	440.175	202.5	-9.40453	-8.48501	-9.12364	-10.3779
202.4	-9.35815	441.958	202.4	-9.12465	-8.24358	-8.92383	-10.1072
202.3	-9.1295	443.787	202.3	-8.86798	-7.97148	-8.74766	-9.86941
202.2	-8.8677	445.493	202.2	-8.61985	-7.72663	-8.55541	-9.69512
202.1	-8.61066	447.152	202.1	-8.3622	-7.48146	-8.37075	-9.58456
202	-8.35741	448.957	202	-8.12391	-7.2635	-8.1423	-9.46435
201.9	-8.12123	450.871	201.9	-7.92498	-7.04407	-7.90364	-9.33631
201.8	-7.88373	452.718	201.8	-7.73945	-6.79939	-7.64472	-9.2589
201.7	-7.59497	454.475	201.7	-7.54112	-6.56954	-7.39623	-9.17925
201.6	-7.30524	456.334	201.6	-7.27618	-6.29031	-7.08718	-9.05351
201.5	-7.03236	458.276	201.5	-6.98146	-6.00669	-6.8281	-8.95798
201.4	-6.80333	460.202	201.4	-6.72111	-5.70566	-6.59375	-8.87497
201.3	-6.56144	462.103	201.3	-6.46865	-5.39702	-6.37835	-8.78006
201.2	-6.29751	464.06	201.2	-6.19592	-5.04386	-6.1554	-8.62955
201.1	-6.03981	466.029	201.1	-5.90641	-4.69439	-5.91319	-8.41729
201	-5.76207	467.982	201	-5.6389	-4.41608	-5.62088	-8.22004
200.9	-5.48627	470.013	200.9	-5.34445	-4.12392	-5.38632	-7.95793
200.8	-5.20411	472.107	200.8	-4.98105	-3.7898	-5.10508	-7.70442
200.7	-4.92489	474.115	200.7	-4.61497	-3.47911	-4.79214	-7.44333
200.6	-4.63518	476.09	200.6	-4.29039	-3.22527	-4.53302	-7.24201
200.5	-4.35173	478.228	200.5	-3.94721	-2.95355	-4.22995	-7.01816
200.4	-4.02392	480.447	200.4	-3.62835	-2.74245	-3.95017	-6.84396
200.3	-3.67457	482.51	200.3	-3.30144	-2.55626	-3.60941	-6.66919
200.2	-3.31928	484.548	200.2	-3.01576	-2.35687	-3.30135	-6.45112
200.1	-2.94976	486.787	200.1	-2.68371	-2.19324	-3.01911	-6.20903
200	-2.58742	489.079	200	-2.33895	-2.02052	-2.72201	-5.86405
199.9	-2.25426	491.212	199.9	-1.98565	-1.88094	-2.3997	-5.58082
199.8	-1.90133	493.375	199.8	-1.65335	-1.72988	-2.05762	-5.38508
199.7	-1.58696	495.695	199.7	-1.38638	-1.51428	-1.7592	-5.15801
199.6	-1.26961	498.012	199.6	-1.0821	-1.30942	-1.49097	-4.86635
199.5	-0.963219	500.259	199.5	-0.732676	-1.05681	-1.24854	-4.60173
199.4	-0.628826	502.573	199.4	-0.36458	-0.857202	-1.0321	-4.5501
199.3	-0.25676	504.919	199.3	0.00846803	-0.642396	-0.819903	-4.36142
199.2	0.137628	507.257	199.2	0.374768	-0.390186	-0.636064	-4.17378
199.1	0.555109	509.673	199.1	0.713772	-0.0947058	-0.426151	-4.05982
199	0.94856	512.077	199	1.01937	0.201329	-0.18404	-4.05902
198.9	1.34827	514.411	198.9	1.37093	0.56214	0.079028	-3.98137
198.8	1.80807	516.858	198.8	1.68251	0.96388	0.405582	-3.78591
198.7	2.26637	519.421	198.7	1.92049	1.31935	0.772071	-3.38298
198.6	2.69445	521.824	198.6	2.1951	1.69137	1.13189	-3.01216
198.5	3.15014	524.209	198.5	2.48048	2.00852	1.48404	-2.70294
198.4	3.68993	526.829	198.4	2.80753	2.32248	1.83699	-2.31611
198.3	4.20756	529.414	198.3	3.07974	2.6616	2.16183	-1.82736
198.2	4.72715	531.817	198.2	3.31406	2.96543	2.3688	-1.38152
198.1	5.1935	534.389	198.1	3.59903	3.27185	2.612	-0.93896
198	5.6638	537.089	198	4.01143	3.57167	2.8833	-0.677215
197.9	6.07639	539.642	197.9	4.48745	3.81274	3.15542	-0.265807
197.8	6.41995	542.207	197.8	4.91073	4.00583	3.41376	0.215782
197.7	6.74655	544.924	197.7	5.27294	4.18316	3.76288	0.662693
197.6	7.04185	547.614	197.6	5.65835	4.39446	4.07941	1.02785
197.5	7.36563	550.287	197.5	6.02954	4.6224	4.37337	1.28702
197.4	7.69289	553.029	197.4	6.35053	4.89033	4.6971	1.36139
197.3	8.00208	555.766	197.3	6.73497	5.16004	4.95049	1.39227
197.2	8.28763	558.57	197.2	7.09901	5.44373	5.29632	1.41762
197.1	8.60735	561.404	197.1	7.41665	5.80072	5.58658	1.55007
197	8.94613	564.153	197	7.8261	6.23294	5.85322	1.73968
196.9	9.25599	567.005	196.9	8.15307	6.71536	6.08589	1.97706
196.8	9.4489	569.975	196.8	8.43177	7.15301	6.45827	2.19821
196.7	9.53708	572.763	196.7	8.70942	7.69238	6.87399	2.38237
196.6	9.65347	575.6	196.6	8.91974	8.02761	7.20873	2.72877
196.5	9.74552	578.655	196.5	9.12412	8.28119	7.46149	3.10539
196.4	9.7657	581.53	196.4	9.32655	8.53371	7.65971	3.63496
196.3	9.76956	584.346	196.3	9.55041	8.70535	7.95432	3.8772
196.2	9.9049	587.406	196.2	9.72998	8.91336	8.17346	4.0945
196.1	10.1417	590.374	196.1	9.81832	9.06332	8.4697	4.41231
196	10.4538	593.2	196	9.95987	9.19767	8.66489	4.83157
195.9	10.7498	596.232	195.9	10.0833	9.42699	8.81103	5.17418
195.8	11.1271	599.276	195.8	10.4406	9.6592	8.88742	5.53113
195.7	11.4246	602.16	195.7	10.9175	9.92144	8.7918	5.95254
195.6	11.7117	605.189	195.6	11.3812	10.1959	8.6672	6.56913
195.5	12.028	608.281	195.5	11.7942	10.3558	8.59274	6.88942
195.4	12.2601	611.276	195.4	12.1534	10.5747	8.4177	7.34911
195.3	12.4656	614.345	195.3	12.4914	10.8829	8.26719	7.82189
195.2	12.4619	617.494	195.2	12.8136	11.2256	7.95383	8.06856
195.1	12.6391	620.628	195.1	13.1743	11.6031	7.66016	8.1245
195	12.5789	623.795	195	13.6539	11.7955	7.41273	8.26583
194.9	12.3841	627.012	194.9	14.1426	11.9255	7.26146	9.08335
194.8	12.3536	630.286	194.8	14.5191	11.9914	7.14342	10.0102
194.7	12.5039	633.552	194.7	14.8822	12.2588	7.08284	10.9629
194.6	12.7351	636.817	194.6	15.2464	12.4799	7.14086	11.2037
194.5	13.053	640.174	194.5	15.3372	12.6942	7.15128	10.8786
194.4	13.3026	643.509	194.4	15.5148	13.0209	7.35936	10.3494
194.3	13.6029	646.769	194.3	15.5663	13.3627	7.51281	9.89746
194.2	13.9834	650.145	194.2	15.4722	13.7055	7.61673	9.88234
194.1	14.0693	653.484	194.1	15.6076	14.0247	7.77779	9.73202
194	14.1286	656.686	194	15.5776	14.4023	7.9435	9.57734
193.9	14.1937	660.001	193.9	15.4871	14.8789	8.04745	9.80563
193.8	14.3781	663.287	193.8	15.5629	15.1313	7.98435	10.148
193.7	14.5877	666.403	193.7	15.6308	15.127	8.03847	9.4055
193.6	14.9242	669.645	193.6	15.5761	15.1343	8.14474	8.85758
193.5	15.2643	672.874	193.5	15.7247	15.0361	8.05542	8.49695
193.4	15.6204	675.932	193.4	16.094	14.8969	7.7621	7.28984
193.3	15.8615	679.131	193.3	16.1804	14.6868	7.45797	5.40122
193.2	15.9454	682.344	193.2	16.2589	14.7374	7.31463	2.98121
193.1	16.0178	685.407	193.1	16.0638	14.8709	7.13763	0.986265
193	16.1272	688.622	193	16.0733	15.1336	6.74017	-1.13247
192.9	16.4023	691.894	192.9	16.0672	15.4481	6.27488	-3.00672
192.8	16.7634	695.056	192.8	16.1594	15.8359	5.86588	-4.75011
192.7	17.1473	698.366	192.7	16.6816	16.22	5.6762	-6.95029
192.6	17.1149	701.743	192.6	17.0814	16.597	5.70203	-9.64102
192.5	16.9457	705.017	192.5	17.258	16.8923	6.01554	-11.8195
192.4	16.6855	708.4	192.4	17.1452	16.8938	6.50508	-13.1959
192.3	16.714	711.832	192.3	16.7053	16.7514	7.22433	-14.054
192.2	16.8437	715.146	192.2	16.3278	16.3367	7.70927	-14.4521
192.1	16.8693	718.522	192.1	15.9764	15.6946	8.0114	-13.864
192	17.3457	721.904	192	15.9003	15.1072	7.83148	-13.7285
191.9	17.7037	725.146	191.9	16.1383	14.607	7.45718	-13
191.8	18.1183	728.408	191.8	16.6036	14.2941	7.56086	-11.3092
191.7	18.1364	731.64	191.7	17.2592	13.7394	7.99084	-10.5951
191.6	18.0645	734.723	191.6	18.4135	13.2969	8.35977	-10.099
191.5	18.3158	737.813	191.5	19.5802	13.0549	8.66641	-9.45998
191.4	18.2595	740.86	191.4	20.3835	12.8421	8.66394	-8.78131
191.3	18.258	743.802	191.3	20.7285	12.4499	8.90131	-9.73124
191.2	18.5494	746.776	191.2	20.7591	12.7274	8.41334	-10.5856
191.1	18.6719	749.72	191.1	20.7055	13.0283	7.94978	-10.8594
191	18.9815	752.62	191	21.0109	13.3883	6.8962	-11.8214
190.9	19.068	755.585	190.9	21.6157	13.9209	5.69192	-13.7539
190.8	19.2137	758.547	190.8	22.4032	14.0725	4.87883	-17.757
190.7	20.2328	761.543	190.7	23.1077	13.3229	4.46381	-20.3168
190.6	20.8607	764.669	190.6	23.9135	12.468	4.30137	-22.4125
190.5	21.5198	767.815	190.5	24.6145	12.1926	4.26502	-23.9275
190.4	22.1132	771.039	190.4	25.249	12.1564	4.35911	-25.5636
190.3	22.4726	774.387	190.3	26.4689	12.0941	4.43749	-26.53
190.2	22.8069	777.716	190.2	27.4593	11.8537	4.77347	-26.5871
190.1	24.1078	781.103	190.1	27.5248	10.769	5.0095	-26.5258
190	25.8656	784.582	190	26.9387	9.4109	5.52614	-25.0114
189.9	27.5388	787.988	189.9	26.713	8.39371	6.11729	-23.3509
189.8	28.4533	791.4	189.8	26.4875	8.0232	5.63393	-21.2246
189.7	28.7427	794.864	189.7	26.5295	8.2296	5.60872	-19.0942
189.6	29.2013	798.217	189.6	26.1556	8.58026	6.71411	-17.3204
189.5	29.3879	801.522	189.5	26.3475	8.02978	8.9447	-14.8146
189.4	28.5756	804.842	189.4	27.2995	7.83468	12.4245	-12.6836
189.3	27.4526	808.074	189.3	26.8737	7.83462	14.9592	-10.3715
189.2	26.5172	811.27	189.2	25.9253	9.01823	16.1694	-7.44366
189.1	25.6258	814.494	189.1	25.129	10.7453	15.8341	-5.20553
189	23.7288	817.721	189	24.426	12.8282	15.5762	-4.34711
188.9	22.072	820.942	188.9	22.8619	15.0029	15.073	-3.77052
188.8	20.8252	824.263	188.8	21.1577	17.9028	15.0814	-4.37635
188.7	19.5206	827.707	188.7	21.117	20.6354	14.4877	-6.30517
188.6	18.5405	831.21	188.6	20.9762	23.2963	13.7083	-7.44163
188.5	18.0254	834.892	188.5	19.9542	24.647	12.5185	-9.22328
188.4	18.7691	838.744	188.4	17.5293	24.8713	11.1826	-11.6581
188.3	19.6634	842.677	188.3	15.868	25.5203	9.44533	-13.3161
188.2	21.3892	846.717	188.2	13.7284	27.2972	7.62472	-14.8329
188.1	22.0356	850.874	188.1	9.69817	29.2192	6.64581	-17.6302
188	22.1146	854.877	188	6.65667	30.7161	5.93345	-19.6402
187.9	21.3467	859.102	187.9	4.22426	32.1228	3.60875	-19.8244
187.8	20.6788	863.367	187.8	1.7785	32.1507	1.45571	-18.2834
187.7	19.9542	867.557	187.7	-0.513453	30.9973	0.0863053	-16.6313
187.6	18.5008	871.695	187.6	-2.91649	29.0186	-0.5468	-14.932
187.5	16.9364	875.879	187.5	-4.12643	28.449	-0.00645485	-13.2579
187.4	16.1047	880.095	187.4	-4.52347	28.669	-0.282449	-9.81421
187.3	15.2249	884.23	187.3	-3.60316	30.1691	-0.252531	-7.16191
187.2	16.4912	888.285	187.2	-1.94038	32.9719	-1.73349	-4.69761
187.1	19.0683	892.043	187.1	-3.11617	35.1017	-3.96547	-3.58614
187	20.6944	896.118	187	-3.69284	36.873	-6.098	-2.72925
186.9	22.9419	900.233	186.9	-4.11294	38.6248	-7.61195	-1.4777
186.8	23.9994	904.35	186.8	-4.5488	39.6189	-8.68293	-0.703344
186.7	22.8589	908.489	186.7	-4.26448	40.9378	-9.34291	-0.988196
186.6	20.4276	912.672	186.6	-3.17388	42.5199	-10.1175	-3.54117
186.5	18.1061	916.896	186.5	-2.57114	43.7435	-11.266	-5.61984
186.4	16.4323	921.046	186.4	-2.48219	44.0575	-11.3599	-7.66213
186.3	14.8803	924.783	186.3	-2.54178	43.8367	-11.6696	-10.3728
186.2	13.6453	926.732	186.2	-2.49254	43.2307	-14.3076	-11.592
186.1	12.636	925.518	186.1	-3.27259	42.8015	-17.7779	-14.5294
186	12.6734	922.929	186	-4.7881	41.5691	-22.137	-16.0831
185.9	13.2825	920.499	185.9	-5.11573	40.0837	-25.1776	-17.3548
185.8	13.6304	919.886	185.8	-3.98444	38.2531	-26.4384	-17.6203
185.7	13.9785	918.986	185.7	-3.25025	35.2235	-27.2937	-17.2481
185.6	15.7049	917.365	185.6	-2.55127	32.6406	-28.313	-16.6652
185.5	17.2126	916.125	185.5	-1.74075	29.877	-29.0271	-16.2215
185.4	17.797	915.443	185.4	-1.18757	26.2088	-29.9845	-15.3516
185.3	18.1822	915.651	185.3	-2.57912	22.923	-30.4349	-14.1447
185.2	18.9048	917.222	185.2	-3.86605	19.5416	-29.6519	-12.0529
185.1	19.0279	918.056	185.1	-5.20081	16.8417	-28.1111	-10.3941
185	18.1726	917.451	185	-4.89246	15.7411	-27.6576	-8.9451
184.9	17.1087	913.903	184.9	-4.98125	15.1653	-26.8256	-8.06309
184.8	15.8969	908.168	184.8	-5.2504	14.5696	-26.0719	-7.35447
184.7	15.1003	902.509	184.7	-3.98616	14.0179	-26.6032	-5.73794
184.6	14.7205	898.474	184.6	-2.86374	13.2644	-26.6576	-5.49663
184.5	14.9794	896.064	184.5	-1.74664	11.9511	-24.3636	-6.66921
184.4	14.7118	894.631	184.4	0.08864	11.1365	-21.419	-7.91126
184.3	15.0984	894.304	184.3	2.15351	12.1883	-20.0919	-9.79699
184.2	17.1033	895.956	184.2	4.12933	14.2679	-18.4663	-11.3852
184.1	19.312	897.224	184.1	3.16949	13.2704	-17.481	-11.9642
184	20.071	897.927	184	1.60066	12.2099	-14.3032	-11.8601
183.9	20.411	898.229	183.9	-0.687308	12.9396	-11.8511	-11.6617
183.8	19.4619	899.805	183.8	-4.41093	12.7962	-8.82235	-11.3835
183.7	16.4938	902.172	183.7	-4.92501	11.4944	-5.24695	-9.99502
183.6	14.429	904.377	183.6	-5.46722	10.7425	-1.16742	-9.19567
183.5	12.2297	907.223	183.5	-6.77962	10.1244	1.90655	-8.29162
183.4	11.1924	909.787	183.4	-8.41741	9.17402	5.54461	-8.33058
183.3	11.792	912.523	183.3	-9.58238	9.11779	8.06628	-7.90688
183.2	13.3519	914.879	183.2	-10.7895	9.71578	10.5405	-5.95299
183.1	14.09	917.424	183.1	-11.8271	9.58857	12.6959	-4.08419
183	14.1215	919.807	183	-10.9675	8.39826	14.0454	-2.44872
182.9	14.0758	921.911	182.9	-9.75531	7.3575	14.9261	-0.250005
182.8	12.7441	926.371	182.8	-9.0572	6.87898	16.6924	1.27203
182.7	11.3896	933.431	182.7	-7.58974	6.58556	17.9648	3.32892
182.6	10.2368	941.867	182.6	-5.99179	6.87631	18.4758	3.74784
182.5	8.56688	950.669	182.5	-4.69111	7.68499	18.7205	4.048
182.4	7.08667	957.338	182.4	-4.37566	6.97821	18.3576	3.30002
182.3	6.31453	965.051	182.3	-4.29739	6.98286	18.6654	2.06944
182.2	5.94973	973.295	182.2	-4.60304	6.25565	18.5575	1.125
182.1	4.40511	980.3	182.1	-4.68734	5.54469	18.4317	-0.252348
182	2.74416	984.595	182	-2.55331	4.97144	18.4653	-0.84369
181.9	1.92711	989.276	181.9	0.305113	4.7907	19.5801	-1.3694
181.8	0.0921776	991.945	181.8	2.41346	4.43604	20.7552	-3.01012
181.7	-1.11657	995.475	181.7	4.43866	4.54703	21.6615	-5.15436
181.6	-2.37047	999.107	181.6	5.45517	4.68365	23.8918	-6.57549
181.5	-4.03499	1006.38	181.5	5.94233	4.63781	25.6469	-8.26888
181.4	-5.58571	1016.13	181.4	5.47824	4.13241	27.264	-9.48784
181.3	-6.61706	1023.55	181.3	5.30922	3.33672	28.6502	-10.9134
181.2	-7.63549	1028.74	181.2	4.4607	2.53622	29.8705	-11.3672
181.1	-8.1803	1032.34	181.1	2.78009	3.24771	29.931	-10.5201
181	-9.04302	1036.24	181	0.265367	3.30592	29.2589	-9.53494
180.9	-10.1689	1038.24	180.9	-1.26937	2.50246	29.3588	-9.24807
180.8	-11.9901	1037.14	180.8	-2.40996	1.72294	29.6478	-8.93053
180.7	-14.3251	1034.25	180.7	-1.02366	2.48812	29.6567	-8.61017
180.6	-17.0004	1032.61	180.6	0.0659146	3.1549	27.5334	-8.54842
180.5	-19.4557	1032.5	180.5	0.924176	1.4769	25.2413	-9.47525
180.4	-21.5308	1030.53	180.4	1.9704	-0.357484	23.1588	-10.816
180.3	-23.1708	1024.95	180.3	3.27809	-1.37489	21.7303	-12.3943
180.2	-24.3742	1021.44	180.2	4.68611	-2.90253	19.2665	-14.4822
180.1	-25.8345	1018.53	180.1	5.13152	-4.55683	17.2001	-16.1479
180	-27.055	1014.92	180	5.3879	-4.98729	13.9289	-17.0843

## Sheet: Optimizatio1
							Ti (III) citrate mM	% Yield				pH	% Yield
							2	32.2276				6.5	57.6
							5	53.7172				7.5	78
							10	71.8832				8.5	60.4
							20	98.5139
			Temperature	% yield
			4°C	42							dark	77
			rt	75							blue light	84

## Sheet: Optimization2
										Aniline:EDA ratio		% Yield			Catalyst mol%	% yield
										01:05:00	1	63.63			0.5	11.2834
										01:10:00	2	77			1	23.6701
										01:20:00	3	69.13			2.2	43.8999
															4.4	82.6563

## Sheet: Optimization3
		time (hour)	%yield (0.5mol%)	%yield(1.0mol%)	%yield(0.25mol%)
		0.5	14.4504	37.7864
		1	25.5725	65.962
		2	38.7797	84.402
		4	55.3209	100
		12	70
		8	65		31
		12			40

## Sheet: Initial rate kinetics
Time (min)	Average conc (Pdt) H136A	SdevP
0	0	0
15	19.6255	1.02908
25	39.9818	1.4341
40	66.5728	0.857364
Time	D134A (avg conc)	D134A (Sdevp_
0	0	0
15	75.9099	1.58273
25	150.994	11.9362
40	245.659	32.2741
TIME (MIN)	T187A	Sdev(T187A)
0	0	0
15	115.925	10.9465
25	180.823	49.6376
40	270.943	9.56979
TIME (MIN)	Parent	Sdev (parent)
0	0	0
15	250.667	40.0154
25	389.822	50.2015
40	571.226	12.0507

## Sheet: Second sphere mutant conversion
									Mutants	Yield (%)	S.D
									Parent	99	0
									T187A	65	3
									D134A	35	5
									H136A	24	2

## Sheet: B12 reconstitution yields
MtaC	% B12 (ICP-MS)	% B12 (UV-Vis (@ 525))
Parent	84	80
H136A	66	65
D134A	52	42
T187A	76	69
